# Supplementary material for: Pulmonary Effects of Traumatic Brain Injury in Mice: A Gene Set Enrichment Analysis
Source: MDPI journal article supplement (doi:10.3390/ijms25053018), 2024-03-05
Supplement: s1 [file s1]

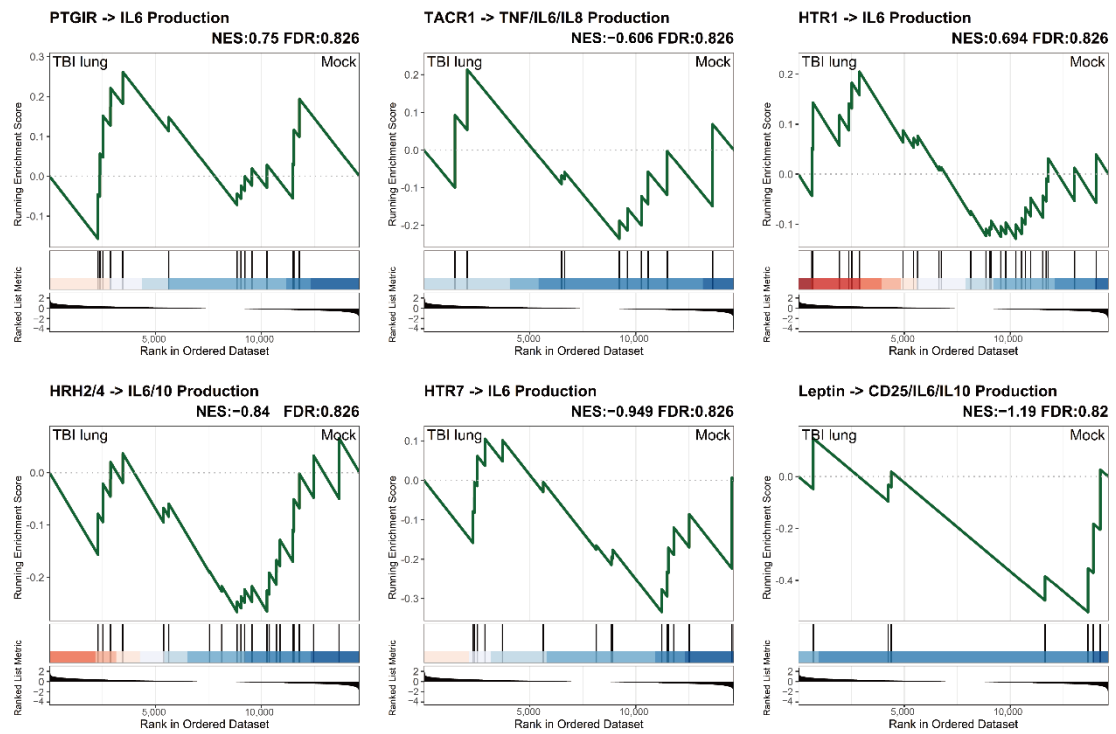

**Supplementary figure 1. Analysis of IL6 production-associated gene sets derived from the Elsevier Pathway Collection. The corresponding GSEA displays the peak distribution of individual gene sets.**
