# Supplementary material for: Pulmonary Effects of Traumatic Brain Injury in Mice: A Gene Set Enrichment Analysis
Source: Int J Mol Sci. 2024 Mar 5;25(5):3018. doi: 10.3390/ijms25053018 (PMC10931562; doi:10.3390/ijms25053018)
Supplement: Supplementary file 1 [file ijms-25-03018-s001.zip › Supplementary Table 1.xlsx]

## Sheet: Lung TBI vs Sham EdgeR result
	logFC	logCPM	PValue	FDR
R3HDM2	2.72919	6.39641	1.70002e-22	1.24373e-18
NXPH4	2.15062	4.44082	2.41866e-14	1.17966e-10
FOSL2	1.9667	4.05164	5.20241e-12	1.90304e-08
C20orf96	1.89074	5.63094	4.02965e-05	0.00670021
LAMC2	1.80551	5.21364	1.04451e-09	2.54721e-06
SYT6	1.77545	2.32526	0.000223032	0.0208868
REC114	1.75773	2.92084	9.67054e-09	1.28636e-05
CSN2	1.73688	5.11753	2.0247e-07	0.000141074
CXCL14	1.72192	3.87465	3.64404e-06	0.00118488
MUTYH	1.62509	2.15737	2.76066e-06	0.000939394
NFYA	1.61543	5.47479	5.01964e-09	8.16082e-06
PDZK1IP1	1.59188	4.60698	0.000711367	0.0402409
EPX	1.56285	3.18142	6.66597e-07	0.000336333
SORCS2	1.55996	3.16005	2.15923e-05	0.00438803
CCL11	1.5578	3.24262	3.45738e-05	0.00616931
MOB1A	1.53954	1.52593	1.27906e-07	0.000111703
FSHB	1.52087	3.00803	1.33317e-07	0.000111703
DAO	1.44798	0.0582377	3.4569e-06	0.00114958
AGTR2	1.4375	0.600224	0.00101662	0.0491707
KIAA2013	1.42439	5.70639	8.08975e-06	0.00197282
SLFN12L	1.40855	1.61245	0.000143993	0.0169912
TNFRSF9	1.37519	1.49381	4.0571e-06	0.00129051
ABCA2	1.36567	4.77395	0.000118022	0.0150228
NKX2-5	1.33953	1.07579	0.000315219	0.0263189
IDNK	1.33155	0.312891	3.0657e-05	0.00567815
RAMP3	1.31261	0.768582	9.59244e-05	0.0131174
RNU11	1.29517	1.11982	0.000273515	0.0241089
KLRG2	1.28825	1.70022	0.0147717	0.185368
LYPD8	1.28655	1.20291	0.0036534	0.094254
RAB2B	1.26661	5.32876	4.2081e-05	0.00684144
NECTIN1	1.26305	5.59657	9.54598e-05	0.0131174
SLC35B2	1.25912	5.44516	0.000138172	0.0168478
COP1	1.24842	4.01843	4.75697e-06	0.00146749
TMEM138	1.22943	1.27821	1.96999e-05	0.00417752
STS	1.22104	4.25375	0.00012041	0.0150584
LRRC47	1.22007	4.82199	0.000183945	0.0199591
PIM3	1.21056	7.56051	0.00018716	0.0199591
DERL3	1.21021	4.38263	0.000502332	0.0334359
FLOT2	1.20362	6.54817	0.000318374	0.0263189
CMTM6	1.20053	7.81925	0.000193648	0.0199591
ATXN7L3B	1.19714	7.45653	0.000736791	0.0409913
PRRC2A	1.19514	4.19089	7.24785e-05	0.0102962
HYPK	1.19273	7.6723	8.44146e-05	0.0118765
BCL7A	1.173	3.55802	0.000316867	0.0263189
GPT	1.17178	9.29192	0.000511269	0.0336305
TNS2	1.17177	5.44223	9.89846e-05	0.0133697
PLA2G15	1.16962	6.24019	3.6732e-05	0.00639836
CA14	1.1587	7.28328	4.826e-05	0.0075458
SERPINA11	1.15636	6.98321	0.000194786	0.0199591
MED24	1.15451	4.96327	0.000437991	0.0309598
PRR14	1.15218	6.51884	0.000620669	0.0370679
GOSR1	1.15188	5.13025	0.0010412	0.0496248
MYCN	1.15177	2.88391	4.84763e-05	0.0075458
RAB5C	1.14848	5.98945	0.000445174	0.0310634
PTOV1	1.14241	5.04833	0.000419099	0.0302082
CACTIN	1.13704	6.01369	0.000577833	0.0355246
FBXO31	1.13645	5.91985	0.000477429	0.0327969
WIZ	1.13283	3.5922	0.00339306	0.0911526
VARS1	1.13234	4.71902	0.00086194	0.0444081
PYGO2	1.12648	5.49127	0.000254705	0.0231481
BORCS6	1.12636	4.08534	0.000781141	0.0423321
ICAM1	1.11973	4.66547	0.0011743	0.0533611
NCOA1	1.11767	4.82333	0.00175758	0.0664969
TXNDC11	1.11362	4.47724	0.000544965	0.0345117
TMEM100	1.11351	1.75489	0.0012932	0.0549241
PLEKHG5	1.11193	3.18451	0.00127585	0.0548098
TP53INP2	1.11132	8.81534	0.00042125	0.0302143
PCDH1	1.11093	5.74957	0.000297705	0.0254738
BNIP1	1.11073	5.41455	0.000741565	0.0411007
DNAL4	1.10808	3.88666	0.000445825	0.0310634
THRAP3	1.10656	6.26672	0.000408829	0.0300603
FKBP8	1.10546	8.11565	0.000190799	0.0199591
SAMD3	1.09724	1.95078	0.0026554	0.0831689
UPF1	1.09356	4.81704	0.00018957	0.0199591
CEBPB	1.09277	8.24829	0.000257717	0.0232017
BDH1	1.08986	5.93576	0.000693742	0.0398072
ATOH8	1.08982	4.47123	0.000873673	0.044446
MAP1LC3A	1.08699	6.70547	0.000874826	0.044446
RARA	1.08657	4.42309	0.00102159	0.0491707
DLGAP4	1.08635	2.76376	0.000327959	0.0266594
STARD13	1.08239	6.12548	0.000356544	0.0277497
EIF4EBP2	1.08082	5.41195	0.000196993	0.0199591
OR1R1P	1.07998	2.23438	0.000861222	0.0444081
ERLIN2	1.07988	5.37825	0.00203249	0.0729558
ADORA1	1.07949	3.70977	0.000707425	0.0402409
KAT7	1.07839	5.60069	0.000266796	0.0236591
WBP2	1.07716	8.18426	0.000279277	0.0243237
DEPDC1B	1.07481	2.01028	0.000209389	0.0202899
DHX38	1.07206	5.31141	0.000334148	0.0268699
SLC35A2	1.07138	4.87112	0.000763691	0.0418514
C11orf87	1.06999	1.03237	0.0123921	0.169459
AP5Z1	1.06954	2.65782	0.00206079	0.0735452
DEPP1	1.06849	7.20706	0.000170069	0.0192903
TRAF1	1.06683	0.871492	0.00304575	0.0886085
SLC19A1	1.06589	3.40709	0.00164616	0.0637213
ZFHX2	1.06563	3.64253	0.000361272	0.0279689
BCL6	1.06444	6.40548	0.00118495	0.0534407
CCDC65	1.06165	2.43552	0.0133277	0.177376
ELMOD2	1.05776	2.85378	0.000142848	0.0169912
ZBTB7A	1.0564	6.20209	0.000994041	0.0483624
BCL3	1.0551	6.34398	0.000276964	0.0242667
TFPT	1.05409	4.41732	0.000535526	0.0343676
TSPAN18	1.05384	0.663805	0.000526115	0.0339124
TERF2IP	1.05166	4.59786	0.00114103	0.0525346
SAT2	1.04572	5.56725	0.00316012	0.0895481
BCL2L12	1.04316	4.446	0.00121005	0.053653
ABHD4	1.03649	7.0885	0.000661967	0.0385892
C11orf96	1.03521	3.2773	0.00276355	0.0839236
RGS9	1.03485	2.05882	0.000387187	0.0291578
SOCS4	1.03275	2.22541	0.00265763	0.0831689
TYSND1	1.0314	6.419	0.00322143	0.090384
SLC9A8	1.03137	4.92981	0.00243342	0.0796552
MGRN1	1.03026	7.26317	0.000638335	0.0378143
FBXO21	1.02919	6.48961	0.00133651	0.0560337
PPIL2	1.02829	5.03409	0.00119187	0.0534953
HDGFL1	1.02737	0.307354	0.180139	0.522003
MTSS2	1.02674	5.94323	0.042788	0.293243
ANKZF1	1.02607	5.27975	0.000544735	0.0345117
IVD	1.02544	8.21765	0.000347429	0.0273157
USP36	1.0251	4.13338	0.00154287	0.0615128
ZBTB16	1.02458	4.46849	0.000414764	0.030087
ADAMTS6	1.02393	1.11702	0.00266821	0.0831689
RASSF3	1.02185	6.49047	0.000886508	0.0447289
MKI67	1.02079	5.25232	0.00195909	0.0712927
SRR	1.02043	7.66086	0.000712512	0.0402409
CDC14B	1.01995	5.66899	0.00156293	0.0618077
MSRB1	1.01976	9.92456	0.000519726	0.0337921
TMEM203	1.01958	5.6173	0.00276942	0.0839236
ANGPTL6	1.01935	6.21523	0.00179102	0.067538
TCF3	1.01883	4.32516	0.00421984	0.100561
WDR83	1.01853	6.92875	0.000794622	0.0425894
MAGOH	1.01813	7.2752	0.00129503	0.0549241
TLE1	1.01729	5.51228	0.00151885	0.0612228
RAB1B	1.01654	5.78316	0.000614014	0.0369722
MLEC	1.01534	5.86101	0.00152314	0.0612268
AGFG2	1.01509	6.26435	0.000974822	0.0478644
ABCG8	1.01404	5.70506	0.000323158	0.0265643
IDH3G	1.01276	7.84537	0.00337066	0.0909955
SLC46A1	1.01172	6.36561	0.00245171	0.0798961
AKAP8L	1.01062	4.7388	0.00126231	0.0548074
FAM53A	1.01039	5.21705	0.00378469	0.0961301
KLF3	1.00852	5.6561	0.00489882	0.107789
DSPP	1.00821	1.73064	0.00204834	0.0732793
SNAP47	1.00784	7.5878	0.00150143	0.0606878
FKBP2	1.00585	7.90806	0.00302109	0.0886085
NUP85	1.00469	4.98415	0.00546948	0.114165
TAF4	1.00458	4.78213	0.00360976	0.0935483
RPS27	1.00427	2.27953	0.00602871	0.117773
GAS7	1.00126	1.41437	0.00207816	0.0737756
DOLPP1	0.997788	4.83536	0.0022669	0.0769589
CYHR1	0.997153	5.38722	0.00305572	0.0886085
INO80	0.993868	3.1259	0.00355827	0.0929725
TBRG4	0.992789	4.38927	0.00317469	0.0895481
LY6G6C	0.992435	2.2282	0.000917879	0.0455268
GIGYF1	0.989011	4.44105	0.0037944	0.0961301
HEMK1	0.988659	4.83913	0.00313314	0.0895481
APPL2	0.988605	5.08662	0.00390017	0.0968884
HMOX1	0.987871	5.58707	0.00122968	0.054032
HIBADH	0.987505	9.64919	0.000553813	0.0346299
LYSMD4	0.983998	4.4153	0.00254973	0.0812744
MYORG	0.983701	5.11209	0.00283457	0.0850118
KLC4	0.9832	6.4095	0.00250152	0.0809601
SPIDR	0.983116	2.81509	0.00252768	0.0811861
DENR	0.982988	6.47301	0.00104657	0.0496256
C19orf53	0.982705	1.97415	0.000628123	0.0373605
FAM204A	0.98235	2.32173	0.00315363	0.0895481
PABIR1	0.981597	4.60842	0.000913111	0.0455268
PARP10	0.981401	4.23197	0.00140799	0.058038
ZBTB43	0.981255	4.93102	0.000868285	0.044446
C11orf71	0.979928	7.26147	0.00365885	0.094254
ST3GAL1	0.979133	6.41953	0.000204464	0.0202143
MAPK7	0.977721	2.95982	0.000502727	0.0334359
WIPI1	0.976507	5.35533	0.00380221	0.0961301
PPP1R14A	0.973909	3.09023	0.00622918	0.120069
AP2S1	0.971966	7.89806	0.0032438	0.090384
RPN1	0.971707	8.89214	0.00307029	0.0886085
CDKN1A	0.971561	6.74739	0.000521939	0.0337921
VMO1	0.970897	5.01904	0.002246	0.0767839
JUP	0.970019	3.44158	0.00329993	0.090384
POLD3	0.969043	4.25252	0.001702	0.065245
CCDC166	0.96704	1.67529	0.00428511	0.100905
INTS5	0.966417	4.85436	0.00645641	0.123008
SLC25A39	0.965144	5.82024	0.005536	0.114856
DDX56	0.964881	5.66408	0.00306959	0.0886085
MED16	0.964468	5.44364	0.001048	0.0496256
TSC22D3	0.964182	8.59676	0.000665868	0.0386339
EQTN	0.961815	2.65753	0.0911638	0.401039
EFNB1	0.961582	4.46337	0.00274879	0.0839236
PHLPP1	0.960201	4.64954	0.0016189	0.0633362
CEP131	0.960173	2.81286	0.0021451	0.0747312
IQSEC1	0.958723	4.2696	0.00144926	0.0593934
CDC42SE1	0.956698	6.16177	0.00119918	0.0534953
ARID5B	0.955447	2.38792	0.00479071	0.10637
LRP10	0.955204	6.1522	0.000430766	0.0305969
MIA2	0.955181	8.86096	0.00127735	0.0548098
AGAP3	0.954324	4.31535	0.00141177	0.058038
RAB24	0.953715	6.35857	0.00153162	0.0612315
USP21	0.953571	5.29009	0.00330441	0.090384
SPNS1	0.952667	5.73689	0.00254807	0.0812744
BUD23	0.952124	5.70983	0.00223739	0.0766685
KYNU	0.950659	7.34893	0.00196357	0.0712927
GGNBP1	0.950105	4.04543	0.00193885	0.0711009
H1-0	0.949747	7.17644	0.00145769	0.059412
MAP2K5	0.949732	5.32679	0.00401442	0.0980617
THAP4	0.949441	5.06771	0.00528469	0.111664
ZBTB14	0.949236	4.21739	0.00579673	0.116504
MARS1	0.946649	7.36426	0.00226634	0.0769589
ZNF692	0.946592	3.86801	0.00528732	0.111664
MT2A	0.946379	10.2945	0.00051563	0.0336817
FANCM	0.946198	2.23358	0.0339726	0.266677
ERH	0.944602	7.02658	0.00191633	0.070629
HELB	0.944173	4.86667	0.00388936	0.0967842
FOS	0.944028	3.28855	0.00905827	0.148471
FLT3LG	0.942711	3.81644	0.00381104	0.0961301
TM9SF1	0.942143	7.19764	0.00266615	0.0831689
MAPRE1	0.941107	4.27977	0.00445191	0.103181
ATMIN	0.940832	9.76963	0.00285271	0.0850118
AFF3	0.940057	4.35277	0.0270384	0.244213
MAPK8IP2	0.939568	7.79773	0.00332915	0.0904519
STRADB	0.939068	6.67087	0.00109407	0.0511451
CORO1B	0.937569	6.99644	0.00124205	0.0544123
GSAP	0.937566	2.94984	0.00554183	0.114856
U2AF2	0.934644	3.48665	0.00486929	0.107462
JUND	0.934196	5.96559	0.0065494	0.123773
UQCRQ	0.933413	9.84465	0.00115252	0.0525346
MAEA	0.933132	5.772	0.00588414	0.116504
RTP3	0.932771	3.4709	0.00284865	0.0850118
PID1	0.932751	7.4297	0.00584526	0.116504
MFSD3	0.93265	4.84274	0.00318241	0.0895481
FLVCR2	0.931858	2.53056	0.00515373	0.110756
CCDC183	0.931632	0.986116	0.0710159	0.358671
PPM1B	0.930651	5.09403	0.0104188	0.155877
BCCIP	0.930371	7.075	0.00317072	0.0895481
SLC30A1	0.930173	6.45249	0.00707095	0.129641
ZNF710	0.929994	4.07092	0.0050151	0.108651
TCHP	0.929666	2.95067	0.000780182	0.0423321
GEMIN7	0.926048	4.91219	0.0039507	0.0975307
HRAS	0.926003	6.64139	0.00576206	0.116199
TFR2	0.925996	8.86724	0.001187	0.0534407
LRRC14	0.925363	4.79681	0.00237298	0.0785777
PNMT	0.924933	2.44474	0.00499189	0.108531
APC	0.924667	1.62023	0.00966172	0.152503
CAPZA3	0.924106	0.490212	0.0378245	0.279237
ALOX5AP	0.923816	3.87822	0.00107311	0.0504881
C2orf81	0.922664	1.57945	0.00119728	0.0534953
KCNAB1	0.920845	1.43487	0.0108563	0.159009
PPP2R3B	0.920405	3.18008	0.00305777	0.0886085
SMAD6	0.920265	2.89351	0.00910185	0.148471
AUP1	0.919348	6.212	0.00158082	0.0623466
EAF2	0.918293	2.7602	0.0209556	0.217926
TSPAN14	0.917165	6.14845	0.00148114	0.0602003
A1CF	0.91607	5.29627	0.00315326	0.0895481
ING4	0.915224	6.44228	0.00275573	0.0839236
KASH5	0.914594	2.67603	0.0118029	0.164566
DHRS11	0.911966	5.88712	0.000805385	0.0428523
TAPBP	0.911902	8.51205	0.00853785	0.144344
FXR2	0.911683	5.17452	0.00220316	0.0759547
FOXN1	0.911613	1.67001	0.00342218	0.0915417
PIM1	0.908812	5.35574	0.00120594	0.0536331
SPHK2	0.907899	6.39755	0.00078808	0.0425361
ACTN1	0.907484	4.31215	0.00995975	0.15367
KATNAL2	0.906958	1.74363	0.0505308	0.311443
HDAC8	0.906565	3.10815	0.0102433	0.154516
NET1	0.906423	6.93771	0.00535536	0.112263
SMAD1	0.903984	4.82004	0.0104121	0.155877
NAA35	0.903749	6.54923	0.00273492	0.0839236
IGBP1	0.902823	6.48497	0.00444632	0.103181
METTL1	0.902414	4.5443	0.00481538	0.106433
SEC31B	0.90188	0.896737	0.00238063	0.0786307
NDRG2	0.900938	11.6833	0.000585354	0.0358364
KLHL8	0.900109	2.18541	0.00418418	0.0998768
NME3	0.899626	4.49853	0.00394166	0.0975307
TRIP10	0.899498	3.23056	0.0060114	0.117592
PTPN21	0.899084	3.96624	0.00314319	0.0895481
TPRN	0.899014	3.38723	0.0083798	0.142873
TOR2A	0.898156	6.71386	0.00805941	0.139722
MTFP1	0.897844	4.01807	0.000814199	0.0431644
CITED2	0.897346	2.48575	0.00233206	0.077775
KLF15	0.896961	7.91776	0.00326499	0.090384
UBE4A	0.896597	6.42939	0.000428987	0.0305969
CUTA	0.895912	8.04039	0.00395099	0.0975307
SNORD35B	0.895339	1.05335	0.00939635	0.150095
OR8U3	0.895203	5.11302	0.107417	0.426751
SNORD89	0.895034	0.50269	0.00528863	0.111664
FBXO4	0.894961	5.42668	0.00380503	0.0961301
EPN1	0.894679	7.23091	0.00208238	0.0737756
ZNF112	0.894191	2.92236	0.0301163	0.2564
SERTAD3	0.893612	4.29056	0.00317098	0.0895481
MST1	0.893328	7.81595	0.00439864	0.102649
SPNS2	0.893203	3.70226	0.00417461	0.0998768
ZNF512	0.892505	3.57164	0.00203431	0.0729558
GALT	0.891844	8.39526	0.0135096	0.178566
SLC1A2	0.891064	6.51296	0.0034014	0.0911526
NUDT22	0.88999	5.68799	0.00329231	0.090384
BCAR1	0.888852	4.85692	0.00267174	0.0831689
CCDC61	0.888563	2.90498	0.00349621	0.092248
RNF214	0.885958	3.81731	0.00875717	0.145864
ACD	0.885929	6.02092	0.0147628	0.185368
PQBP1	0.885809	5.61122	0.00521614	0.11142
RNF19A	0.885625	5.24786	0.00587383	0.116504
MKNK1	0.883785	5.58898	0.00194589	0.0711805
SNAP29	0.883137	5.68852	0.00766178	0.136052
PPP2R5C	0.883062	5.24671	0.0110241	0.160108
SPECC1L	0.882921	5.57653	0.00457213	0.103681
RTN4IP1	0.882305	4.32324	0.0117681	0.164566
VCP	0.881306	8.08075	0.0102861	0.155001
CCL15	0.879925	3.10488	0.00436407	0.102005
AASDH	0.879887	4.41672	0.00323068	0.090384
SNORD12	0.879771	2.51035	0.00454093	0.103409
NLN	0.878946	4.86513	0.0107735	0.158736
UBE2L3	0.876181	7.50416	0.00534303	0.112165
THTPA	0.876051	6.06779	0.00306879	0.0886085
RNF212	0.875403	2.13812	0.0398249	0.286126
TRADD	0.875123	5.70313	0.00587063	0.116504
RIPOR1	0.874473	4.13423	0.0045443	0.103409
IL6R	0.874442	7.13741	0.00592508	0.116704
SBK1	0.873541	3.96151	0.00355773	0.0929725
PCOLCE	0.873334	4.03051	0.00704489	0.129336
TMEM53	0.873321	6.55819	0.00622061	0.120069
PDGFB	0.873072	1.82072	0.00457751	0.103681
CHD4	0.873029	6.73174	0.00407417	0.0991524
INF2	0.872873	6.56994	0.000599663	0.0364077
PURB	0.86904	6.54842	0.00451788	0.103338
TRIM26	0.868797	5.87502	0.00239196	0.0786708
IGFBP6	0.868129	2.66511	0.0054842	0.114243
XYLT2	0.86702	4.5531	0.00557214	0.115158
PRR15	0.866858	1.38154	0.0038484	0.0966315
HNRNPU	0.866169	6.64597	0.00581668	0.116504
ZFP1	0.865859	3.93436	0.00649492	0.12353
ETV6	0.86561	5.07163	0.00170336	0.065245
CLIC3	0.864816	0.497123	0.00418309	0.0998768
GABPB2	0.864495	4.12296	0.0101699	0.154516
CERK	0.863871	2.24689	0.00555567	0.11498
TMEM186	0.863581	4.29958	0.0108192	0.158783
TRAIP	0.863554	3.28699	0.0871243	0.392731
GUK1	0.862531	8.06006	0.0044808	0.103338
HAPLN4	0.862365	3.96624	0.00362552	0.0937254
PLEKHG6	0.862108	3.76345	0.012766	0.172956
VMA21	0.861416	6.16476	0.00723067	0.130767
PON3	0.861387	6.00605	0.0109381	0.159727
ZNF326	0.861113	5.16844	0.00306729	0.0886085
CLCC1	0.860624	5.97651	0.00809935	0.140082
LGALS8	0.859258	6.43593	0.00587029	0.116504
TRAK2	0.858892	4.9442	0.00652656	0.1237
PELI2	0.858313	2.91973	0.00571739	0.115847
BCL2L13	0.857866	5.73705	0.0091353	0.148691
SNRNP27	0.856729	6.03746	0.00870869	0.145864
GPATCH3	0.855824	3.58217	0.00424829	0.100572
ZNF25	0.85505	2.44412	0.00233346	0.077775
DMRTC1	0.853757	1.02549	0.00348593	0.092248
MRPL22	0.853521	7.39495	0.00448325	0.103338
TSR3	0.852901	4.00948	0.00880759	0.14628
EPHX3	0.852741	1.01245	0.0358656	0.272899
SH3GLB2	0.852454	4.69137	0.0044567	0.103181
RRP36	0.851656	4.69355	0.0046183	0.104252
SLC25A10	0.850512	7.29797	0.00280527	0.0844582
CAP1	0.850016	3.93046	0.0085298	0.144344
RASAL1	0.849928	1.18796	0.005328	0.112142
KCNJ4	0.84914	5.70937	0.0399571	0.286126
RAPGEF1	0.84805	5.09484	0.0105531	0.157404
DDR1	0.847672	1.51002	0.00903011	0.148471
C3orf33	0.847385	3.78127	0.0117827	0.164566
DHRS4	0.846682	8.56756	0.00660539	0.124229
CLPTM1	0.846633	5.83811	0.0112122	0.161156
MAP3K7	0.846495	5.56175	0.00750543	0.13409
DDB2	0.84619	2.3803	0.00734709	0.132067
GPC4	0.845771	5.60448	0.00212914	0.0745302
ITGA7	0.841175	3.49863	0.00478319	0.106364
LBP	0.841039	6.97634	0.00258642	0.0818985
ASNS	0.840538	4.49002	0.00207827	0.0737756
LRRC3	0.840197	6.62166	0.0112848	0.161406
EXOC4	0.840006	3.82487	0.0138771	0.180488
L3MBTL2	0.839645	4.33185	0.00671786	0.125377
SHC1	0.839397	5.44538	0.0042609	0.100572
MRPS28	0.839029	7.20776	0.00456974	0.103681
MDP1	0.83898	5.53678	0.00429041	0.100905
SUGP2	0.838781	2.01792	0.0166421	0.19606
ZNF512B	0.838781	5.66676	0.00854811	0.144344
FABP7	0.838676	1.44222	0.0101606	0.154516
REEP4	0.83832	5.40369	0.014845	0.185969
KLHDC4	0.836458	4.33241	0.00969257	0.152692
SLC18B1	0.83553	1.9684	0.0107974	0.158736
CRYAB	0.835075	3.45344	0.0137812	0.179881
ZNF407	0.831662	2.29519	0.00800448	0.139099
PLCE1	0.830324	2.05263	0.0157753	0.191025
MSH2	0.829474	3.49162	0.00633162	0.121262
FLAD1	0.829204	5.86693	0.00523491	0.111658
TBX4	0.829036	4.33379	0.0356527	0.27227
PAF1	0.828794	5.36361	0.00517266	0.110756
PIP4K2C	0.828171	5.57501	0.0015519	0.0615378
RNU12	0.82811	0.743245	0.0117898	0.164566
NEIL2	0.827684	0.341311	0.00750067	0.13409
RMND5B	0.827386	3.58184	0.00702632	0.12932
UBE3C	0.826206	4.95318	0.00909608	0.148471
ETNK2	0.826056	8.51332	0.00460485	0.104139
GRINA	0.82521	7.90929	0.00416438	0.0998768
COA5	0.824864	8.16953	0.00381708	0.0961301
PLD2	0.824776	3.49989	0.0131356	0.176655
CSTF1	0.82426	5.69638	0.00613623	0.119395
UFSP1	0.824033	3.12317	0.0097951	0.152692
RBL2	0.823463	3.88034	0.0131328	0.176655
EVL	0.822546	2.52399	0.0143322	0.182673
RALBP1	0.821406	6.21062	0.00780096	0.137027
AK1	0.821005	-0.0131538	0.00975654	0.152692
AKR7A2	0.82085	8.13463	0.0107497	0.158559
GPR22	0.820611	3.12703	0.00472125	0.105629
TMEM97	0.820223	8.15469	0.0106589	0.158176
KRI1	0.820095	4.02545	0.00412163	0.099373
SPI1	0.818729	4.77648	0.00617745	0.119879
FAM234A	0.818712	6.32982	0.00114341	0.0525346
ATP11B	0.818164	6.32483	0.00655475	0.123773
LANCL3	0.817997	0.55387	0.00913566	0.148691
PHLDB1	0.817843	2.22492	0.0146026	0.184353
IGFBP5	0.81731	4.11648	0.00374326	0.09609
PRSS29P	0.817136	1.47767	0.0222367	0.224521
SAA4	0.817128	9.93183	0.00126929	0.0548098
GAN	0.816567	4.03524	0.0237648	0.230602
RIT1	0.816446	5.64205	0.0105169	0.157023
IPO13	0.815097	5.55431	0.00515656	0.110756
DNAL1	0.814135	1.53099	0.00501808	0.108651
HSF4	0.813548	3.64957	0.0173141	0.201063
VPS39	0.813519	3.44629	0.0198098	0.213586
ASIP	0.813451	1.50009	0.0322007	0.262021
METRN	0.813212	4.66631	0.020298	0.214786
NANP	0.812407	5.85918	0.0195533	0.212086
MCM6	0.811839	2.31036	0.0159291	0.191515
SELENOK	0.811606	7.40296	0.00331134	0.0903946
EHD3	0.81105	5.60268	0.0157926	0.191025
SLC25A42	0.810576	4.06853	0.00386159	0.0966315
EIF4A2	0.810168	5.25984	0.0106332	0.158115
F10	0.810082	7.15784	0.00489084	0.107775
FEV	0.809788	3.19635	0.013634	0.178892
CITED4	0.809707	0.742467	0.00980336	0.152692
TNXB	0.809103	2.2597	0.00813956	0.140506
MKRN1	0.80762	4.98765	0.00595007	0.116704
NECAP1	0.80703	5.75401	0.0110408	0.160108
AHCTF1	0.807011	5.25865	0.0103349	0.155381
PPP1R7	0.806366	3.99769	0.0121793	0.167646
RAB21	0.806247	5.63634	0.00232892	0.077775
MTA1	0.805024	3.80753	0.00497433	0.108472
ADI1	0.804576	7.68106	0.00934063	0.149959
JAGN1	0.804538	7.0962	0.0037674	0.0961301
XRCC5	0.803917	5.35219	0.0134176	0.177832
HEY1	0.803904	3.1096	0.0158345	0.191025
SCARA5	0.803454	4.94688	0.00494216	0.108254
TMEM254	0.803223	3.48213	0.0164805	0.195336
IRF3	0.803157	7.28933	0.00450137	0.103338
ZNF524	0.802871	5.13975	0.0156466	0.190785
ANKRD13A	0.802736	5.85137	0.00496051	0.108472
BCKDHA	0.802413	6.92836	0.0135474	0.178743
SARDH	0.801652	9.46539	0.00497186	0.108472
MINDY1	0.801348	6.37696	0.00670485	0.125377
LAMTOR4	0.801141	7.45128	0.00611581	0.119156
DBNL	0.800977	4.1238	0.00904782	0.148471
IQCE	0.800661	3.22804	0.00395269	0.0975307
KRT7	0.800213	4.13618	0.0350808	0.269875
TAP2	0.800125	5.71531	0.0103252	0.155381
MAN2C1	0.799988	5.5186	0.0105701	0.157496
CAMLG	0.79994	5.27515	0.00753986	0.134377
CD99L2	0.798961	5.86648	0.0222202	0.224521
C15orf62	0.798395	1.07698	0.00630327	0.120877
ATXN1L	0.797788	4.23795	0.0127523	0.172931
IL20RB	0.797254	6.36493	0.0116887	0.16447
FN1	0.79709	8.49091	0.0101554	0.154516
FAM193A	0.79649	4.16574	0.00561905	0.115313
SBDS	0.796257	7.30095	0.00588232	0.116504
SMIM14	0.795365	8.48371	0.0175032	0.201489
CAB39	0.795229	5.99662	0.0100189	0.153979
TXNDC5	0.795213	8.11352	0.00570196	0.115847
ARL6IP4	0.79497	5.53162	0.0267136	0.243112
SLC12A9	0.794761	3.44426	0.0077682	0.13692
PCBP4	0.793526	5.20783	0.0124772	0.169987
SUMO3	0.793039	8.78905	0.0065655	0.123773
TBCD	0.792709	5.56541	0.023422	0.229238
TENM2	0.79254	1.99949	0.0479911	0.307504
PTCD2	0.792262	6.30872	0.0214266	0.22061
PRDM15	0.791991	2.20192	0.00724129	0.130767
ZDHHC5	0.790749	2.3714	0.0069803	0.128635
ZZEF1	0.790176	5.10442	0.0083831	0.142873
ACAD10	0.789762	4.38066	0.0208798	0.217447
USP10	0.78972	7.20845	0.00842617	0.143362
MRM2	0.789438	4.51774	0.00689421	0.127691
SMOC1	0.789382	8.01275	0.00465622	0.104494
KPNA6	0.78927	5.57144	0.00852157	0.144344
MYC	0.788728	4.31929	0.0112419	0.161193
CHPF2	0.787416	4.00185	0.00872296	0.145864
VPS53	0.787291	5.7887	0.00690533	0.127735
SLC2A1	0.785843	5.3412	0.00326887	0.090384
TEFM	0.785471	5.40601	0.0216523	0.221475
AQR	0.784857	4.34627	0.0076514	0.136033
RNF167	0.784511	6.34612	0.00181168	0.0677967
BCKDK	0.784461	1.96254	0.0171633	0.199629
AEBP1	0.78439	0.163947	0.0155832	0.190502
CTSE	0.784206	2.02038	0.0878298	0.394661
ACADSB	0.783604	8.21181	0.00889231	0.14702
TBC1D13	0.78358	5.1656	0.0179855	0.203943
PROX1	0.782751	5.06076	0.0106476	0.158169
MRPL12	0.782262	7.33125	0.00986155	0.153179
ACY3	0.782125	7.03564	0.00291273	0.0864483
ABRAXAS1	0.781723	3.83131	0.0200114	0.214668
SLC45A3	0.781379	5.78345	0.0141514	0.181794
USP38	0.78113	3.87645	0.0134595	0.178065
CAPN10	0.780906	6.00558	0.0162694	0.193697
ZNF628	0.780374	2.04774	0.0108436	0.158982
DUSP10	0.780206	2.24295	0.00560826	0.115263
ATP5F1E	0.779789	9.32584	0.00819022	0.14089
NFE2L1	0.779577	6.77875	0.00209909	0.0738358
PRKAB1	0.778534	5.43738	0.011735	0.16447
H1-2	0.778013	8.023	0.0195527	0.212086
PDLIM1	0.77793	7.02565	0.0086755	0.14574
NR0B2	0.777682	5.79123	0.00272943	0.0839236
AGAP1	0.776688	3.28213	0.0257501	0.239238
NDUFB2	0.776339	7.92932	0.00876259	0.145864
IRF5	0.776122	5.68653	0.0101776	0.154516
CDCA3	0.775571	2.78635	0.0139936	0.181199
SS18L1	0.7746	3.86405	0.0226737	0.226222
LRRC49	0.774234	0.52652	0.0221502	0.22434
ODAD3	0.773607	1.65066	0.0149695	0.186729
BACH2	0.771803	3.56774	0.0062707	0.120527
SCARB1	0.771128	8.08474	0.00400628	0.0980265
MICAL3	0.770091	4.54733	0.012047	0.166451
GABRA3	0.769981	1.62865	0.0167053	0.196647
TBC1D14	0.769925	4.68344	0.0140722	0.181349
SHTN1	0.76984	6.90864	0.0177718	0.202252
NSUN2	0.769601	2.88007	0.00895583	0.147736
PPP1R21	0.769277	4.56215	0.0113479	0.161834
TBC1D5	0.768261	3.44601	0.0140989	0.181349
IRF8	0.768238	2.62413	0.0080941	0.140082
CCNB1IP1	0.767903	0.548052	0.0273327	0.245207
GDF15	0.767874	5.7093	0.00350622	0.092248
APBB1	0.767411	3.14336	0.0868205	0.392328
SERPINE2	0.76704	4.46218	0.00379669	0.0961301
CDKAL1	0.766709	5.03188	0.0136873	0.178892
PIAS4	0.76639	3.05863	0.0114238	0.162443
SLC25A34	0.76622	2.73528	0.00969873	0.152692
ZFPM1	0.765851	6.52244	0.00887373	0.146878
TFF3	0.765121	4.93966	0.0237459	0.230602
PIGW	0.765072	1.96552	0.00781624	0.137131
ACSF2	0.764615	5.35598	0.00463572	0.104252
PAOX	0.764588	7.44572	0.0320858	0.261797
ZBTB48	0.764517	5.40296	0.00332207	0.0904519
TNFRSF4	0.764064	1.4943	0.00921649	0.149223
CDC123	0.764027	7.1322	0.0087434	0.145864
IGSF11	0.763803	4.45906	0.0119279	0.165274
METTL22	0.763638	4.64424	0.0132774	0.177376
VGF	0.76299	3.47355	0.138264	0.46742
ZC3H12D	0.762597	3.80914	0.0158491	0.191025
RAB11A	0.762456	7.53436	0.0110034	0.160108
CXXC5	0.761458	6.26687	0.0025943	0.0818985
WDR43	0.761361	3.28909	0.0358463	0.272895
LZTS2	0.760918	3.85693	0.0227227	0.226222
SMYD2	0.760812	5.85774	0.0190318	0.210097
CIC	0.760768	5.56098	0.0210335	0.218443
TBC1D19	0.760684	2.1788	0.0164145	0.194949
ZCCHC8	0.760354	3.86787	0.00732203	0.131941
PYCR2	0.759806	4.25379	0.0154683	0.190139
SNRPA1	0.759651	5.50003	0.0222629	0.224521
PTH1R	0.759639	3.63142	0.0146648	0.18466
ZNF219	0.758882	5.13185	0.0130629	0.176
SNX8	0.757835	5.64173	0.0117217	0.16447
NAP1L4	0.757141	7.39357	0.00936008	0.150007
PLEKHA7	0.756936	0.961326	0.0415928	0.289803
GNAT2	0.756742	1.72284	0.0136712	0.178892
TRIB1	0.756264	4.35045	0.0066395	0.12471
SYNRG	0.755622	2.94622	0.024604	0.233797
GNB2	0.755565	5.6029	0.011036	0.160108
PEX5	0.7553	8.03405	0.0141987	0.181923
CPN1	0.755227	9.87563	0.00517747	0.110756
AFTPH	0.755097	6.77184	0.0240162	0.232104
TMEM101	0.753092	3.48632	0.0132542	0.177273
CEP85	0.753029	6.36465	0.00396862	0.097759
ARFGAP2	0.752174	6.60275	0.0151088	0.187419
GPC2	0.752094	2.21162	0.00945972	0.150591
SLC17A9	0.751737	3.92171	0.0278459	0.247233
BCL2L2	0.751432	5.29639	0.0168192	0.197365
ZFP36	0.751158	7.47112	0.0027703	0.0839236
SLC4A1AP	0.75093	4.48077	0.0182397	0.205123
SMPD2	0.750337	5.37032	0.0165897	0.195916
FEM1A	0.749845	4.95227	0.0145428	0.184177
ARRDC3	0.749802	7.02417	0.00927505	0.149299
SLC35B3	0.748484	5.88032	0.0227843	0.226579
ZFP36L2	0.748341	6.68805	0.00650896	0.12353
UTP3	0.747597	6.54798	0.0196782	0.212967
LINGO4	0.747459	3.21439	0.0115491	0.163588
AMDHD2	0.746944	5.95564	0.0140508	0.181349
ANK3	0.746638	3.84967	0.0145665	0.184177
BPNT2	0.746273	5.18482	0.0174908	0.201489
ZSCAN20	0.745911	1.90387	0.0163017	0.19379
NR1H3	0.745877	7.47286	0.0129093	0.174412
COLGALT1	0.745358	6.35833	0.0117017	0.16447
UBE2I	0.744819	6.13249	0.0150319	0.187188
PRPSAP1	0.744452	5.57723	0.0102208	0.154516
IDUA	0.744358	2.95677	0.0173551	0.201084
SMARCC2	0.744299	5.17777	0.00463832	0.104252
SH2D7	0.744233	0.261469	0.0550561	0.321699
CYB561	0.744186	4.8594	0.0157026	0.191011
HERC4	0.743656	6.20773	0.012844	0.173691
AFG3L2	0.742642	5.71399	0.0242676	0.232667
FADS2	0.742263	6.8996	0.0122597	0.168188
MEIKIN	0.741859	1.46631	0.109784	0.430545
BSCL2	0.741619	8.81417	0.0185417	0.207101
STAM	0.74131	4.69256	0.0346946	0.268692
CXXC1	0.741157	6.43696	0.0109315	0.159727
TDP1	0.740746	3.59924	0.0242054	0.23255
GET4	0.740402	4.53407	0.0234057	0.229232
FAM91A1	0.740123	6.56572	0.0171804	0.199669
NOC2L	0.739646	5.40865	0.0140678	0.181349
JUNB	0.739488	4.62948	0.00584614	0.116504
GBF1	0.738394	5.94947	0.00400439	0.0980265
H6PD	0.738254	8.85686	0.00413658	0.09955
PACC1	0.738177	1.67991	0.0202768	0.214786
RADX	0.737797	1.41294	0.0226333	0.226222
SLC15A3	0.73739	2.61708	0.015522	0.190216
REXO2	0.737319	7.84617	0.00874948	0.145864
CLCN7	0.737066	5.07152	0.0168917	0.19759
LYPLA2	0.736825	7.37031	0.0118473	0.164781
DPH2	0.736596	3.62029	0.0238722	0.231017
PLCB3	0.736454	4.6056	0.0173571	0.201084
SCAMP1	0.73604	7.66153	0.00909199	0.148471
TMEM50A	0.735955	7.88492	0.0204287	0.215276
UBL4A	0.735701	5.53757	0.0158377	0.191025
MCM3	0.735619	2.09213	0.0270013	0.24418
LRP1	0.73452	8.68861	0.00869995	0.145864
ATP23	0.734046	3.63606	0.0400874	0.286405
COA6	0.733614	7.48677	0.0321819	0.262021
C2CD2L	0.733558	6.80444	0.0286983	0.250994
PPM1G	0.733224	6.8999	0.00585022	0.116504
VTI1A	0.732435	3.33726	0.0237882	0.230662
MANBAL	0.73211	5.02266	0.0164872	0.195336
CDC42EP4	0.731727	5.90978	0.010606	0.15787
SSRP1	0.731701	4.77391	0.0178203	0.202343
CD22	0.731505	5.91856	0.00980938	0.152692
COPZ2	0.731385	5.91499	0.0112648	0.161278
DBIL5P	0.731273	0.399888	0.0332005	0.265809
MAPK14	0.731158	6.35617	0.0246068	0.233797
CDK19	0.731079	4.5036	0.00875996	0.145864
ASXL2	0.730958	3.97007	0.0179942	0.203943
CMC2	0.730659	6.10987	0.0130529	0.176
KBTBD7	0.730282	5.18438	0.0321862	0.262021
OMA1	0.729398	6.63447	0.0117113	0.16447
AKIP1	0.728487	5.48712	0.0268087	0.243196
MPRIP	0.728216	3.11511	0.0297012	0.25519
CYP26A1	0.728167	4.45559	0.0222172	0.224521
TTLL5	0.727967	4.25181	0.0244535	0.233401
TAF1	0.727945	2.33717	0.0122647	0.168188
ZMYM5	0.727391	4.30277	0.0390426	0.28365
CBLC	0.72722	4.0812	0.0123684	0.169293
DHX40	0.726883	4.40225	0.0151327	0.187486
MACF1	0.72642	5.40509	0.0140993	0.181349
NDOR1	0.726376	3.39689	0.0342535	0.267448
TOMM40	0.726202	5.44519	0.00592637	0.116704
UBE2Q1	0.725992	3.99821	0.0151145	0.187419
PLXNB2	0.725979	7.7287	0.00313664	0.0895481
SRSF9	0.725894	7.3781	0.0173321	0.201084
GADD45A	0.725557	3.70836	0.0106704	0.158185
IFITM3	0.72538	10.6246	0.00722951	0.130767
N4BP3	0.72526	1.7448	0.0161593	0.193697
RBM47	0.725092	6.80497	0.0133613	0.177569
JADE2	0.725089	4.41033	0.0115694	0.163716
RHBDD1	0.725063	5.12196	0.0273961	0.245324
TEX54	0.724582	4.20816	0.0077693	0.13692
ARMT1	0.724164	4.66798	0.028161	0.248435
MYO6	0.724058	4.5439	0.0232918	0.228776
MON1A	0.723567	2.38354	0.0227041	0.226222
GPBP1L1	0.723541	4.32184	0.0409745	0.288459
SEPHS2	0.723494	9.7322	0.00615718	0.119644
ZMAT2	0.723413	5.76464	0.0168338	0.197365
ACBD4	0.723405	7.15112	0.0181109	0.204809
TMEM109	0.723025	6.52578	0.0332137	0.265809
MKRN2OS	0.72287	4.01582	0.031469	0.260893
ADGRA2	0.722512	3.10345	0.0432282	0.29392
TRIM41	0.721498	6.08875	0.00452704	0.103338
ATP1A1	0.720788	8.78979	0.0174835	0.201489
ZNF511	0.720573	3.25331	0.033557	0.266522
AGPAT3	0.720553	7.04625	0.0177663	0.202252
UQCRC1	0.720448	7.97159	0.010041	0.154003
FBXO34	0.720035	5.26739	0.0201105	0.214723
TBL1X	0.71978	4.16355	0.0221813	0.224452
ECE1	0.719743	7.2754	0.00714658	0.130223
ITIH3	0.719722	10.5946	0.014016	0.181329
EI24	0.719054	6.77966	0.0136838	0.178892
SLC25A33	0.7189	6.29893	0.00857262	0.144344
CYB561A3	0.718847	6.067	0.0136708	0.178892
PXDN	0.718343	4.16446	0.0285404	0.250434
TNRC6C	0.718183	3.96666	0.0147457	0.18536
ANP32A	0.718162	7.77789	0.015976	0.191922
FTSJ3	0.717644	5.57193	0.0276552	0.246422
MAP2K3	0.717349	7.27008	0.00679004	0.126402
CNFN	0.717222	6.02679	0.00681277	0.126664
PDZD11	0.716809	5.26545	0.0248287	0.234686
XRN1	0.716411	3.43623	0.021366	0.22016
RBM43	0.716244	4.34093	0.00958071	0.151551
PIGU	0.716204	5.29149	0.0221549	0.22434
TMUB2	0.71542	5.0349	0.0184216	0.206232
CCDC6	0.715297	6.54194	0.0190474	0.210097
WWP2	0.714917	3.20325	0.0371132	0.27692
TLK1	0.714496	5.12907	0.028168	0.248435
RNF152	0.713727	4.06063	0.0431375	0.293801
UPB1	0.713104	9.63332	0.00761099	0.135479
PROSER3	0.713039	3.13101	0.00937965	0.150029
PGLS	0.713028	8.11792	0.0255225	0.237561
TPRA1	0.713001	4.81417	0.00943097	0.150484
LAIR1	0.712899	1.8808	0.0457541	0.302382
SLC9A1	0.712618	2.85693	0.0157735	0.191025
STAT3	0.711893	5.22955	0.0156672	0.190876
UTP11	0.711873	6.44358	0.0177758	0.202252
DPF3	0.711272	0.00318597	0.0221242	0.22434
NTAQ1	0.71097	3.66192	0.0268558	0.243409
TBX3	0.710918	6.8269	0.0113259	0.161679
PLEKHM1	0.710276	4.27948	0.0369611	0.276862
CYP8B1	0.709136	9.88709	0.015395	0.190139
SLC35C1	0.709046	5.14316	0.019537	0.212086
NAA40	0.708905	3.62667	0.0193718	0.211771
GLG1	0.708763	7.10357	0.0154101	0.190139
EIF4G3	0.708112	3.66942	0.02383	0.230761
GRB14	0.708003	6.73779	0.00778613	0.136931
RHBDF2	0.707824	4.92581	0.00992721	0.153384
TTC19	0.707739	2.66951	0.0340097	0.266728
ZMYM4	0.707024	3.963	0.0387619	0.282878
KAZALD1	0.70683	2.30406	0.0248578	0.23481
PTPN23	0.706359	4.18583	0.00951304	0.150841
CCNDBP1	0.705972	4.05932	0.0355406	0.271556
BAG6	0.705878	7.93114	0.00605274	0.118085
ZFPL1	0.705437	5.35233	0.0146387	0.18449
PTPA	0.705243	6.47298	0.0046882	0.10505
TST	0.705084	8.77839	0.00908433	0.148471
LGR4	0.704602	7.07964	0.0116971	0.16447
KDM7A	0.704423	2.74739	0.0342351	0.267447
VNN1	0.703917	7.21371	0.0316666	0.260893
RAD21	0.703886	7.10873	0.030412	0.257815
QRSL1	0.703195	4.80365	0.0197517	0.213575
OGFR	0.702662	6.10753	0.0166275	0.19606
MAP4K2	0.702546	3.16751	0.00973742	0.152692
MRPL21	0.702174	4.28975	0.009919	0.153384
METTL17	0.70185	4.76388	0.0139238	0.180649
BEND3	0.701526	3.00938	0.0176507	0.202244
EMC7	0.701403	7.23163	0.0436656	0.295056
CSNK1G2	0.701279	5.8391	0.0189237	0.209291
PPP1R15B	0.700544	7.3946	0.0109781	0.160108
ESRRA	0.69999	4.43848	0.0230993	0.227814
RLIM	0.698851	6.48967	0.00915676	0.148868
CDC42BPG	0.697982	4.42422	0.0275466	0.246219
PDP2	0.695832	5.90445	0.00703897	0.129336
SDS	0.695544	8.28442	0.00938196	0.150029
LIN7A	0.695002	5.55214	0.024957	0.234966
TLR12P	0.694828	4.12474	0.0411902	0.289062
ACE	0.694238	0.767082	0.0265093	0.24222
PKN2	0.693806	2.89111	0.0386301	0.282878
RELL1	0.693663	4.70208	0.0517183	0.313418
TAOK2	0.693599	2.97401	0.0232385	0.228585
WASL	0.692898	7.50192	0.0177991	0.202343
CBFA2T3	0.692819	3.15481	0.0400554	0.286334
HS3ST6	0.692428	2.97592	0.0334971	0.266421
FAM172A	0.69241	4.55624	0.0200434	0.214723
YPEL3	0.692358	8.01307	0.00516906	0.110756
C20orf27	0.691962	2.27278	0.0131486	0.176667
DOK1	0.691671	3.1322	0.020421	0.215276
POLR2K	0.69124	3.71114	0.0431706	0.293801
MAK16	0.690696	4.55909	0.0194043	0.211771
TMEM205	0.690191	10.2318	0.017006	0.198431
BBX	0.689873	3.47705	0.0316368	0.260893
CWC25	0.68955	2.53095	0.0384845	0.282542
PPAN	0.689338	4.89858	0.0400578	0.286334
MAP3K8	0.689288	2.11004	0.0311884	0.260325
UQCC2	0.689026	6.91197	0.0324254	0.262677
UBALD1	0.6888	3.91728	0.018873	0.208912
DYNLRB1	0.688376	8.10989	0.0127108	0.172688
CA5A	0.688242	8.91927	0.0107434	0.158559
ARL16	0.687796	4.11422	0.0322999	0.262562
MRPS15	0.687773	6.83243	0.0244172	0.233239
DNAJC9	0.687242	3.92964	0.0320881	0.261797
SYNDIG1	0.686834	2.42012	0.0294716	0.254269
SLC11A2	0.686271	5.63127	0.0323663	0.262664
TJAP1	0.68597	3.15903	0.0583613	0.327403
CEP89	0.685793	3.12555	0.0128223	0.173557
SRBD1	0.68544	4.3736	0.0171559	0.199629
UVSSA	0.684974	3.90317	0.0265363	0.24222
POP4	0.684671	6.08002	0.0278205	0.247233
S100A16	0.684409	6.14837	0.0338507	0.266561
FITM1	0.684404	6.72191	0.0149671	0.186729
NR1I3	0.684227	7.2654	0.0163037	0.19379
EPHB4	0.684043	5.84881	0.0100644	0.154039
BCAT2	0.684006	3.83766	0.0470279	0.304683
TFAP4	0.683331	3.09521	0.0145113	0.184177
SLC5A6	0.683293	3.45301	0.0202567	0.214786
RCOR3	0.6831	1.96991	0.0324483	0.262677
MRPL42	0.683056	7.33422	0.0334673	0.266421
HPS6	0.682779	4.7112	0.0211604	0.219122
CD209	0.681471	4.96806	0.0113726	0.162029
PINK1	0.681403	6.94123	0.0126901	0.172566
GPAT3	0.680978	3.21396	0.0404258	0.287495
LGALS1	0.680931	7.32405	0.0234709	0.229257
ACAT1	0.680821	7.24291	0.0214725	0.22061
PHF7	0.680782	3.03951	0.0263632	0.241883
RANGAP1	0.680664	6.78601	0.0286002	0.250585
IDH2	0.680306	7.70075	0.0228616	0.226941
CMTM2	0.680015	3.15386	0.0379488	0.27945
MON1B	0.679618	4.52668	0.0261371	0.24083
RTN4RL1	0.679456	4.5629	0.0102424	0.154516
INO80E	0.678837	2.9209	0.0528042	0.314695
CEP170B	0.678608	6.56925	0.0258414	0.239463
PLSCR1	0.678375	6.37108	0.0288562	0.251657
SND1	0.678329	8.17629	0.00569701	0.115847
NOL6	0.678167	3.25203	0.0241794	0.23255
CD320	0.677693	3.49007	0.0280271	0.24794
PLAU	0.677414	1.96716	0.0660959	0.347611
SELENON	0.67741	3.37451	0.0404408	0.287495
DHX37	0.677363	3.24051	0.0124516	0.169856
EIF2AK3	0.677342	4.58416	0.0449737	0.299661
ANGEL2	0.677334	5.62684	0.0460632	0.302564
PUM1	0.67655	5.04895	0.0150992	0.187419
CD84	0.676054	3.66112	0.0486688	0.308326
ADRB3	0.675918	4.68528	0.0123586	0.169293
YWHAQ	0.675654	6.55886	0.0361797	0.273981
RABGAP1	0.675404	4.90511	0.0286907	0.250994
AGBL5	0.675335	0.803454	0.0489118	0.309044
ATM	0.675212	1.6042	0.0339197	0.266561
HDAC4	0.675091	4.69994	0.0170875	0.199222
SLC12A4	0.675014	3.29441	0.0202518	0.214786
FAM214A	0.674923	7.9363	0.00923225	0.149239
HJURP	0.674879	0.586594	0.0198029	0.213586
CNPY3	0.674409	6.14386	0.0114077	0.162372
SLC25A22	0.674094	7.87875	0.00623401	0.120069
HGSNAT	0.67346	7.57956	0.0191964	0.211173
CENPF	0.672463	2.84561	0.209195	0.552715
CAMTA2	0.672339	3.58833	0.0158055	0.191025
ZFR	0.67192	6.48637	0.0268661	0.243409
SCARF2	0.671867	3.66015	0.0362636	0.274208
TPST2	0.671671	7.18237	0.0182113	0.205123
L3MBTL3	0.671588	2.04037	0.0727939	0.36278
SKP2	0.671223	1.83575	0.0315133	0.260893
ARL14EP	0.670196	3.99687	0.0330466	0.265243
ERCC4	0.67	2.80114	0.0427663	0.293232
UBE3B	0.669711	6.17604	0.0112478	0.161193
NT5DC2	0.669694	3.76768	0.0345138	0.26805
NBN	0.669566	4.28636	0.0532672	0.315804
ILDR2	0.669237	6.28585	0.0131913	0.176722
DCAF5	0.668808	5.4548	0.0276641	0.246422
TOB2	0.668755	5.7932	0.010789	0.158736
EXOC7	0.668677	6.54918	0.02048	0.215276
LPIN3	0.668617	2.1835	0.0314564	0.260893
PLEC	0.668471	6.52424	0.0142188	0.18202
ENDOU	0.667887	1.79429	0.0473837	0.305505
VPS50	0.667826	4.35019	0.0246815	0.233895
ZNF28	0.667791	3.06641	0.0486763	0.308326
EIF4H	0.66761	8.75732	0.0193465	0.211726
TMEM143	0.667259	4.50988	0.0157147	0.191011
SDF2L1	0.66686	6.67462	0.00830438	0.14245
PLA2G4F	0.666591	2.17927	0.0362382	0.274166
IL1RL2	0.666499	2.18724	0.121564	0.44433
TREM1	0.666187	4.49814	0.0178253	0.202343
EIF2B5	0.665889	4.99861	0.0251161	0.235312
TBC1D31	0.665845	3.18755	0.0244938	0.233634
NMNAT3	0.66569	2.26331	0.0436919	0.295056
TTYH2	0.665648	7.68446	0.012088	0.166545
NOL11	0.665561	4.51148	0.0335203	0.266421
MFN2	0.665352	8.44332	0.027522	0.246165
NR2F6	0.665195	7.36191	0.00814306	0.140506
HENMT1	0.665162	2.32292	0.0831571	0.384498
TAPBPL	0.665098	4.76929	0.0344977	0.26805
CERS5	0.665036	6.37788	0.0110328	0.160108
SRMS	0.66409	0.573745	0.0573001	0.324543
CLEC7A	0.664008	3.13512	0.0468295	0.304267
BAHCC1	0.663522	3.14077	0.0431267	0.293801
SLC8A1	0.662661	2.38615	0.136562	0.465088
KCTD6	0.661818	3.97387	0.0267024	0.243112
GLIPR1	0.661255	2.10068	0.0387586	0.282878
ELAVL1	0.661206	6.94815	0.0258118	0.23934
RNF115	0.6611	6.11619	0.0249648	0.234966
CDK5R1	0.660906	1.15645	0.0285912	0.250585
MAP2K7	0.659628	5.13089	0.011782	0.164566
PLEKHH3	0.659351	4.27761	0.0138633	0.180469
ZCCHC7	0.65922	4.84445	0.0466114	0.303539
DPY19L3	0.659158	3.42822	0.0260616	0.240632
SLC30A5	0.658818	6.44559	0.0509871	0.312544
RBM27	0.658435	3.78284	0.0327137	0.263683
CFP	0.658435	6.98716	0.0190187	0.210097
C2	0.657903	7.96048	0.0175336	0.201489
GTF2IRD2B	0.657874	2.88762	0.0387478	0.282878
MED17	0.657854	4.19516	0.042669	0.292839
FKRP	0.657751	3.31608	0.0264433	0.241883
ISG15	0.657328	4.77053	0.0249015	0.234966
ABHD17C	0.657255	7.7756	0.0114594	0.162791
SUPT7L	0.657118	4.50457	0.0202102	0.214786
GCGR	0.656486	7.17193	0.0152661	0.18898
NAT9	0.656191	5.97884	0.0182459	0.205123
ARID3B	0.656085	3.13671	0.0201328	0.214723
PNPLA2	0.655944	7.47362	0.0143855	0.183193
EIF4G1	0.655794	8.87601	0.00751545	0.134105
TM6SF2	0.65578	5.98595	0.0101979	0.154516
AP1AR	0.655722	6.61227	0.0431302	0.293801
RNF213	0.655712	5.75838	0.0281318	0.248416
G6PC3	0.655622	3.42014	0.0259177	0.23982
FLYWCH1	0.655336	1.56948	0.0507662	0.312106
TP53BP2	0.655091	3.27279	0.0214551	0.22061
SH3GL1	0.654918	6.08197	0.0111613	0.160898
TMEM51	0.654365	4.7714	0.0341094	0.267158
NAV2	0.654267	2.28799	0.0524737	0.314695
MACO1	0.653351	6.53877	0.0202118	0.214786
SAMD1	0.653254	5.55129	0.0122601	0.168188
SP5	0.653214	1.60328	0.0201304	0.214723
TTC30A	0.652402	1.78512	0.0336991	0.266561
BYSL	0.652351	4.39688	0.0421962	0.291646
SNHG3	0.652243	5.65135	0.0114943	0.163101
UBXN1	0.651734	9.09102	0.00934684	0.149959
LGI4	0.651579	2.26332	0.104583	0.422058
ARL5B	0.651335	3.23327	0.0288055	0.251632
EMC9	0.651031	6.14464	0.0541154	0.318285
FAM149B1	0.650823	3.85697	0.0252149	0.235677
ADA	0.65042	1.26258	0.0646693	0.343289
USHBP1	0.650387	3.85253	0.0270304	0.244213
TFIP11	0.649992	4.36281	0.0185944	0.207373
ARHGAP12	0.649172	2.90193	0.0380457	0.280023
CDK10	0.648664	5.89775	0.0120287	0.166356
TXK	0.648536	0.0867656	0.0588933	0.329029
ADAD2	0.648456	1.30262	0.2643	0.605095
TGIF1	0.648415	5.24706	0.0286637	0.250992
ANKRD12	0.648386	2.39057	0.0394444	0.285051
PCYT2	0.647904	6.99611	0.0182736	0.205203
AP3M1	0.647721	4.51412	0.0390122	0.28365
SLC39A7	0.647442	7.40461	0.0264497	0.241883
PIK3R2	0.64737	4.36305	0.0281292	0.248416
PIK3CB	0.647114	4.19071	0.0467549	0.303917
U2AF1L4	0.646858	6.12186	0.0133162	0.177376
COBLL1	0.646652	6.07285	0.0310629	0.260325
GPR108	0.64665	5.56916	0.0294758	0.254269
COG1	0.646306	5.3066	0.0304876	0.258306
ZFP3	0.646092	0.981031	0.0348507	0.268953
DXO	0.64605	5.40755	0.0251201	0.235312
PRR5	0.645829	2.81688	0.0264432	0.241883
GPIHBP1	0.645818	6.26432	0.0425422	0.292518
SNX1	0.645657	5.23435	0.0546325	0.320266
PACSIN2	0.644984	6.5259	0.0226188	0.226222
MRAS	0.644918	3.55875	0.0288944	0.251657
ARTN	0.644637	3.80818	0.0338138	0.266561
SMAD4	0.644467	5.99509	0.0502208	0.310973
PPARA	0.644459	2.82539	0.0481979	0.307967
TTC30B	0.644343	3.09052	0.0291821	0.253257
TRIM25	0.644297	7.9134	0.016849	0.197385
S100A13	0.644176	7.52567	0.0273789	0.245321
FBXO46	0.644169	3.53114	0.0240353	0.232135
ZBTB22	0.644153	4.74199	0.0228398	0.226879
SLC25A45	0.643982	6.46773	0.0162341	0.193697
FKBP11	0.643876	5.30406	0.0470243	0.304683
ZNF689	0.643774	1.37416	0.0718139	0.36035
TCF7	0.643732	2.12151	0.0237407	0.230602
SEMA5B	0.643686	1.30144	0.0247554	0.234144
PPP2R5E	0.643466	4.27418	0.0159285	0.191515
PEBP1	0.64338	10.09	0.0376985	0.27887
THAP3	0.642382	5.14569	0.0155089	0.190215
AGTRAP	0.642325	1.97773	0.0519436	0.313418
ZNF260	0.642251	5.23025	0.0493125	0.309543
PPP5C	0.642196	5.38969	0.0246576	0.233895
BAG3	0.64213	5.43299	0.0317464	0.261109
DZANK1	0.641712	0.616337	0.0425193	0.292516
DCP1A	0.64169	3.43673	0.0208002	0.216927
TACC2	0.641391	5.61983	0.0142388	0.182043
ABCD4	0.641253	4.92949	0.0215623	0.221248
PLS3	0.641021	6.85999	0.0250946	0.235312
PTPN18	0.640532	3.62248	0.0513844	0.313418
OGFOD2	0.640028	4.91333	0.0176889	0.202252
AAR2	0.640008	0.970673	0.0654908	0.34642
F2	0.639618	10.8212	0.0192576	0.211294
SLC22A7	0.639506	5.06801	0.0138137	0.179989
RAD54L2	0.639403	4.13947	0.0240923	0.232379
GRN	0.639354	8.60774	0.0241762	0.23255
BABAM2	0.638502	5.06524	0.0324023	0.262677
ZNF507	0.638361	4.58734	0.0547543	0.320594
SYVN1	0.637514	7.63637	0.0138978	0.180597
LEPROT	0.637427	4.93094	0.0392963	0.284363
AGO1	0.637186	5.57394	0.0145543	0.184177
HIP1R	0.637128	5.99176	0.0122496	0.168188
H2AZ2	0.637103	3.01076	0.0431629	0.293801
ARL8A	0.63668	4.01143	0.0275237	0.246165
MIEN1	0.63582	8.3624	0.0271123	0.244579
PSMG4	0.635564	5.53718	0.0321107	0.261797
VPS54	0.634765	5.95818	0.0403518	0.287453
PTPN11	0.634736	7.20574	0.0485592	0.308326
WIPI2	0.63446	6.3242	0.0117307	0.16447
IFITM2	0.63433	8.15693	0.0230248	0.227715
AGXT2	0.634304	7.18207	0.03997	0.286126
NKTR	0.634099	5.37285	0.0276871	0.246422
GAB1	0.63402	3.88743	0.0352297	0.27067
CAPNS1	0.633979	6.93214	0.0484373	0.308326
PCNT	0.633886	3.97738	0.0198027	0.213586
SLC29A3	0.633532	4.4636	0.0372298	0.27748
PAQR4	0.633405	1.35846	0.0370565	0.276862
TOR1AIP2	0.633338	6.44795	0.0291298	0.253109
NUDT16L1	0.6332	5.30774	0.0174747	0.201489
DAZAP2	0.632281	8.43024	0.0231066	0.227814
APONP	0.632206	7.77647	0.0218823	0.222813
SHPRH	0.631843	4.33401	0.0514911	0.313418
GSTO1	0.631677	9.43476	0.048199	0.307967
STK40	0.631464	5.93155	0.0638562	0.342035
YEATS2	0.630998	3.57478	0.0240633	0.232252
ARMC8	0.63088	3.40251	0.0257518	0.239238
TNFAIP2	0.630741	4.43026	0.0346836	0.268692
CD2	0.630285	1.99121	0.118813	0.44189
URAD	0.629491	5.83725	0.050385	0.3112
SLC43A3	0.629469	6.48103	0.0155783	0.190502
RNPEP	0.629185	6.56914	0.0140722	0.181349
AATK	0.629012	3.46161	0.0227942	0.226579
TXNDC17	0.628737	6.41804	0.0234545	0.229249
ANKRD46	0.628574	6.59286	0.0350677	0.269875
DLG1	0.628326	6.15673	0.0252323	0.235677
WDR35	0.628275	1.58018	0.0298551	0.255761
MARCHF8	0.628123	6.7166	0.0385154	0.282627
RCL1	0.62785	8.57664	0.0124415	0.169856
PARP14	0.627787	5.78835	0.0517388	0.313418
UBE2H	0.627701	7.05148	0.0225315	0.226175
BOP1	0.62769	4.01971	0.0365503	0.27553
FBXW4	0.627321	5.00602	0.0230601	0.227715
FAM219B	0.627204	2.03182	0.0476094	0.305901
SMG6	0.6271	5.19798	0.0182424	0.205123
SLC16A7	0.62679	6.47701	0.0509615	0.312518
GPATCH2	0.625901	3.63002	0.0317832	0.261265
HES1	0.625448	3.8197	0.0552685	0.32193
SLC25A38	0.624956	6.21134	0.0461965	0.302566
TBL3	0.624911	4.36429	0.0197636	0.213575
DCPS	0.624168	5.5068	0.0342252	0.267447
POC1B	0.624162	3.68646	0.0420463	0.291255
SLC9A3R1	0.623617	8.37144	0.0224761	0.226175
CGNL1	0.623515	6.92145	0.0174655	0.201489
PECR	0.623442	9.66361	0.0264393	0.241883
IFT43	0.623153	3.04354	0.0681469	0.35193
ATP4A	0.623042	1.51557	0.0553614	0.322087
ENPP5	0.623026	4.56108	0.019641	0.212722
GART	0.623019	6.07551	0.052716	0.314695
GLB1	0.622601	5.40647	0.0429339	0.293801
POLR2E	0.622583	7.37958	0.0212361	0.219262
PSMC2	0.622567	8.75079	0.0620873	0.337092
TAS2R41	0.622387	0.247461	0.135783	0.464202
STAT2	0.622296	5.70797	0.0406168	0.287799
PHF2	0.62207	4.47269	0.0307679	0.258985
WIPF3	0.621729	3.46723	0.0655684	0.34642
RNH1	0.621324	6.74362	0.0216638	0.221475
THUMPD1	0.621298	4.71399	0.0413084	0.289178
SSH3	0.621201	2.45345	0.0258088	0.23934
MOS	0.621144	0.801241	0.0306368	0.258741
SNX17	0.62019	6.01308	0.0227273	0.226222
TNFRSF13B	0.61955	-0.110493	0.124878	0.448067
VEGFC	0.619471	3.07146	0.0540195	0.318194
FHAD1	0.619172	2.1492	0.0564746	0.324031
DRG2	0.618863	5.68358	0.027315	0.245198
GANAB	0.618847	7.7623	0.0210889	0.218846
TMEM176A	0.618802	3.56387	0.0294259	0.254269
PIGB	0.618474	0.718468	0.0654477	0.34634
MAN1B1	0.618194	2.69454	0.0412172	0.289113
PTPMT1	0.617847	7.38502	0.0420988	0.291385
ZDHHC13	0.617661	3.6195	0.080207	0.379432
RRP9	0.617648	2.67823	0.0316377	0.260893
PLA2G3	0.617626	2.66937	0.0433208	0.294079
PRSS36	0.617283	3.641	0.045741	0.302382
BIK	0.616802	4.2299	0.0202497	0.214786
FAM222B	0.616757	5.95527	0.0306381	0.258741
DPP3	0.616549	7.28963	0.030018	0.2564
FAM53C	0.616517	4.77204	0.0194426	0.211771
SEZ6	0.616468	0.929878	0.0300573	0.2564
EPHX1	0.616325	9.47831	0.0292276	0.253272
UBP1	0.616277	5.80663	0.0719148	0.360724
TRPT1	0.616253	1.29708	0.0337037	0.266561
ZNF746	0.616097	4.29905	0.0587749	0.32894
SETD6	0.615677	5.26048	0.0292764	0.253272
AMBRA1	0.615588	3.88347	0.0310634	0.260325
BLM	0.615569	1.94412	0.0402236	0.287099
USP2	0.615097	3.80484	0.0848377	0.387967
KLKB1	0.615002	8.7135	0.0225835	0.226175
GABRB1	0.614859	2.38047	0.0401843	0.286958
GSTZ1	0.614077	10.056	0.0501841	0.310954
DEDD2	0.614	6.48327	0.0603799	0.333057
ANAPC2	0.613856	6.51695	0.0510571	0.312717
POLD4	0.613674	5.02849	0.0851562	0.388648
SMIM20	0.613668	5.0982	0.0684254	0.352411
MB21D2	0.613614	5.32037	0.0349209	0.269267
TGFBR3	0.613554	5.2536	0.032545	0.262824
MRPL11	0.613409	6.78976	0.0501746	0.310954
DDRGK1	0.613328	9.14879	0.0495385	0.31025
ZC3H13	0.613166	4.91737	0.0462162	0.302566
DGKA	0.613028	4.14619	0.0782598	0.375124
GOLT1A	0.61301	2.74293	0.051142	0.312969
UBR2	0.612571	6.83662	0.014403	0.183256
NOA1	0.612533	5.39068	0.0379489	0.27945
FLOT1	0.612482	5.98671	0.0341843	0.267335
UCHL3	0.612133	8.01861	0.0279296	0.247281
ADAMTSL2	0.612008	2.20739	0.0359812	0.27321
CCDC71L	0.611759	2.0765	0.0578538	0.325553
LRRC4B	0.611596	1.6554	0.0396061	0.285446
MGAT1	0.611573	6.77255	0.0151075	0.187419
FRAT2	0.611448	3.62992	0.0486145	0.308326
IGFBP4	0.611426	10.4142	0.0139906	0.181199
MAP3K6	0.611238	1.62835	0.0527588	0.314695
CD3E	0.611048	4.40787	0.0242472	0.232646
DNMT1	0.610839	2.68013	0.0461398	0.302564
TRIB3	0.610794	4.19976	0.0216384	0.221475
ZFAND2A	0.610741	4.83578	0.0751032	0.36856
TXLNG	0.610343	5.26284	0.0783326	0.375299
PANK3	0.610116	7.04102	0.0262407	0.241429
UBE2G1	0.609747	5.50614	0.0421939	0.291646
TBC1D23	0.609501	4.1595	0.0741792	0.366301
PLEK2	0.609316	1.56705	0.0366174	0.275894
WDR46	0.608343	5.18611	0.0301207	0.2564
PTPDC1	0.607937	0.751893	0.0694914	0.355102
CUL4A	0.607913	7.64828	0.0562461	0.324031
MIR122	0.607841	1.83001	0.0337807	0.266561
RNF150	0.607822	3.08291	0.028536	0.250434
HIKESHI	0.607672	5.21734	0.0558926	0.323705
AK4	0.607624	7.50224	0.0136743	0.178892
ADAL	0.607603	4.33239	0.077598	0.373896
PARL	0.607018	6.55734	0.0838471	0.385437
OSGIN1	0.606825	8.23251	0.0127503	0.172931
EXOSC7	0.606663	6.48207	0.0162018	0.193697
MGP	0.606504	5.0435	0.0992509	0.415044
MORN2	0.606474	6.61797	0.0320586	0.261797
ANKRD13C	0.605875	2.67774	0.0367939	0.276612
KLHL30	0.60574	1.35837	0.0542513	0.318797
SNRPD2	0.605058	6.93658	0.0354742	0.271556
GPR39	0.605017	3.3337	0.0508809	0.312155
PALLD	0.604833	5.01949	0.0315978	0.260893
MYOM1	0.604173	0.218677	0.0495526	0.31025
ATRNL1	0.604015	5.00697	0.0795261	0.378292
VHL	0.604011	5.00571	0.0580479	0.326299
HMGB3	0.603487	4.62133	0.0609276	0.333917
NLK	0.603397	3.60536	0.0759351	0.370029
SLC6A9	0.602995	6.94724	0.0216753	0.221475
ZNFX1	0.602934	4.67551	0.0317365	0.261109
NSMCE2	0.602842	3.95149	0.0997236	0.41576
TMEM102	0.60283	2.16852	0.0318519	0.261413
GEM	0.602636	1.51237	0.0505126	0.311443
ADAM19	0.602625	0.39832	0.0521939	0.31428
TENM3	0.602596	2.87006	0.039624	0.285446
BNIP2	0.602258	6.11716	0.038751	0.282878
USF1	0.602001	3.79559	0.0682847	0.352182
ITFG2	0.601724	4.22149	0.0347665	0.268728
CEP95	0.601654	3.2616	0.04206	0.291255
ARHGAP11A	0.601536	0.71608	0.0541596	0.318386
ZGLP1	0.601441	4.40875	0.141148	0.469809
PTPRM	0.601081	4.33249	0.0235896	0.229802
CRTC2	0.60081	5.89741	0.0182448	0.205123
ARHGAP4	0.60061	4.09494	0.120263	0.4433
SNHG20	0.600439	5.7718	0.0405545	0.287649
FBXW7	0.600365	3.81654	0.0758647	0.369894
LDAH	0.600243	6.83729	0.0329714	0.26493
NPR2	0.600078	6.26345	0.03014	0.2564
PNKD	0.599525	8.30893	0.0182525	0.205123
TTC7B	0.599507	4.58584	0.0342982	0.267469
SCARB2	0.599247	5.74193	0.0458019	0.302431
TRIM11	0.59922	6.03097	0.020134	0.214723
ACTR5	0.59868	3.8356	0.0589422	0.329177
CCDC102A	0.598556	0.365899	0.0610147	0.334203
HDGFL2	0.598266	5.66231	0.0348257	0.268902
ARF3	0.598053	6.28763	0.0448955	0.299413
USP19	0.597645	6.73492	0.0191517	0.211014
B4GALNT1	0.597589	6.61534	0.0194246	0.211771
LRIT1	0.597555	4.77214	0.0569691	0.324405
CRYGN	0.597404	2.85529	0.0461657	0.302564
DCAF4	0.597075	1.87314	0.0516956	0.313418
MIER1	0.596978	5.61012	0.0465068	0.303539
WDCP	0.596868	1.21091	0.0552211	0.321782
CC2D1A	0.596856	3.87959	0.0376956	0.27887
DNAJC13	0.596387	2.46851	0.0337612	0.266561
HDAC5	0.596375	5.08969	0.0263798	0.241883
TMEM94	0.596211	2.76211	0.0316045	0.260893
CIB1	0.595935	7.78977	0.0246992	0.233895
PPP1R3A	0.595842	0.381123	0.118016	0.440813
LARS1	0.595823	5.69742	0.0436029	0.29496
MED13L	0.595717	0.955425	0.0522163	0.314286
MX1	0.594493	3.44898	0.0291477	0.253109
ATG14	0.593897	5.87895	0.0284522	0.250038
RING1	0.593605	3.93357	0.0483876	0.308326
DENND5A	0.593514	3.25469	0.072216	0.361339
PAXX	0.592949	6.19769	0.0207119	0.216314
GTDC1	0.592928	2.88696	0.0605845	0.333057
SMAGP	0.592876	5.50526	0.0527927	0.314695
CTBP1	0.592825	7.54823	0.0158252	0.191025
HAUS3	0.592122	3.51622	0.0679295	0.351122
KPNB1	0.592056	5.78829	0.075943	0.370029
ACP6	0.591379	7.31412	0.038655	0.282878
SRD5A1	0.591264	7.50136	0.0582666	0.327185
AP1S3	0.591068	1.32267	0.0688598	0.353817
IFNAR1	0.589715	3.54176	0.0474087	0.305505
ATG10	0.589423	3.90397	0.0665956	0.348549
TMEM241	0.588586	2.23317	0.0538419	0.317795
CNPPD1	0.588418	6.67811	0.0194519	0.211771
RAE1	0.588126	4.94916	0.0428573	0.29358
GPLD1	0.588118	8.12014	0.0162527	0.193697
SUGP1	0.588053	5.50429	0.0430377	0.293801
PPP1R37	0.587958	5.3628	0.025251	0.235677
SLC39A9	0.587475	6.57915	0.0186465	0.207637
LAMTOR2	0.587464	8.6541	0.035817	0.272813
PTPRK	0.587314	6.0383	0.0245315	0.233688
PSAP	0.587219	8.87762	0.0223983	0.225556
ALKBH5	0.586988	6.05702	0.0780742	0.37492
SETD2	0.586833	5.64677	0.0432915	0.294079
RIN3	0.58681	4.87672	0.0330423	0.265243
PON1	0.586713	11.3964	0.0314462	0.260893
SURF4	0.586398	8.7117	0.0337459	0.266561
ST6GALNAC6	0.58627	5.68712	0.0446102	0.298053
CARS1	0.586094	4.95924	0.0413252	0.289178
AHCY	0.585941	9.66902	0.0398705	0.286126
B3GNTL1	0.58579	2.43148	0.0806421	0.379664
SNORD15A	0.585779	0.77742	0.0485019	0.308326
EDA	0.585722	2.14572	0.0454058	0.301795
TTLL4	0.585562	1.00544	0.0768473	0.372204
MROH1	0.585357	6.08751	0.0270715	0.244361
THEM7P	0.585232	4.60911	0.068388	0.352411
USP7	0.585202	5.77195	0.0220065	0.223456
SEC13	0.585062	7.74441	0.0643275	0.342955
SERINC3	0.58502	5.45807	0.0757407	0.369894
ATAD2	0.584328	2.41728	0.0919986	0.403031
ATP5F1D	0.584091	0.551511	0.0503156	0.311071
NDST1	0.584027	8.05338	0.016531	0.195539
LINS1	0.583775	6.8267	0.0198376	0.213586
NAXD	0.583668	7.23123	0.0422918	0.292031
FCGRT	0.583618	8.8855	0.0383377	0.281605
CLEC6A	0.583559	3.66557	0.0433574	0.294079
LAMP1	0.583383	10.5028	0.0520916	0.314182
FCGR1A	0.583193	1.25442	0.104591	0.422058
MXD3	0.582867	2.15131	0.037388	0.277704
USF3	0.58231	5.50554	0.071793	0.36035
PAH	0.582258	8.90946	0.0395803	0.285435
ACSM5	0.582195	7.97023	0.0312454	0.260515
RCC1	0.58187	4.10092	0.0573417	0.324543
PCGF5	0.581524	4.08316	0.0572434	0.324543
IFT20	0.581465	7.37998	0.0424921	0.292516
COG2	0.581449	5.34031	0.0333298	0.265809
CBX6	0.581168	3.38698	0.067469	0.350403
PAFAH2	0.58102	8.39161	0.0296282	0.254844
ATOX1	0.580875	9.61584	0.0370939	0.276918
ZFAND3	0.580857	6.08114	0.02118	0.219122
P2RX4	0.580642	5.84004	0.0474915	0.305641
GABRR1	0.580631	4.51127	0.0655212	0.34642
SLC16A10	0.580627	6.38369	0.02069	0.216314
SMYD3	0.580067	1.13894	0.0684058	0.352411
ATG4B	0.58005	4.74017	0.0527578	0.314695
DPT	0.579869	2.57024	0.0865915	0.392019
RAI1	0.579807	2.94473	0.0445871	0.298035
NOP2	0.57971	4.13084	0.0466857	0.303731
RERE	0.579123	4.76785	0.0306219	0.258741
VAT1	0.579002	4.08273	0.0526006	0.314695
PRSS8	0.578666	3.51591	0.0452424	0.300903
ACVR2A	0.578659	3.65523	0.075856	0.369894
SCAPER	0.57831	2.93968	0.075185	0.368669
FBRSL1	0.577841	4.16232	0.0886689	0.396275
SUSD2	0.577625	1.9994	0.0480321	0.307573
ARRB1	0.577403	3.79382	0.0541207	0.318285
MGAT4B	0.577268	5.29989	0.051793	0.313418
ZCCHC10	0.576995	3.02966	0.0591574	0.329623
PFN1	0.576521	6.83588	0.0265319	0.24222
OXLD1	0.575972	6.32997	0.0694733	0.355102
HS3ST3A1	0.575957	3.05565	0.0713986	0.359375
PPP1R35	0.575893	4.1931	0.0393612	0.284693
POP1	0.575805	3.18332	0.0600933	0.332052
NUDT13	0.57564	3.2613	0.0938999	0.406516
BMP2	0.575112	6.29158	0.0338931	0.266561
TUBB	0.574809	4.0722	0.0399643	0.286126
ZFP14	0.574736	0.885016	0.079457	0.378209
ATP5MJ	0.574702	9.89555	0.0806621	0.379664
PSMC5	0.574647	7.38878	0.0311611	0.260325
VPS13D	0.574423	4.86435	0.0814962	0.381158
HPS4	0.574115	5.33768	0.0317212	0.261109
NCALD	0.573839	4.33368	0.0429787	0.293801
GCLM	0.573778	7.19682	0.0522888	0.31439
PPM1M	0.573568	5.78331	0.0390172	0.28365
LUC7L2	0.573479	8.48996	0.0303766	0.257664
PLEKHB1	0.573053	7.46611	0.0230629	0.227715
SNAPC2	0.572701	4.71878	0.0330781	0.265351
RAPH1	0.572354	4.38972	0.0594266	0.33062
WAPL	0.572216	6.26318	0.106493	0.425876
AHSA1	0.572216	8.1373	0.0778801	0.374234
PRTN3	0.57191	4.12153	0.0331868	0.265809
LETM2	0.571813	2.85957	0.0768899	0.372288
RNPEPL1	0.571554	6.0815	0.0257739	0.239292
GABRB3	0.571186	1.12778	0.06526	0.345964
TTPA	0.571127	7.39383	0.0517965	0.313418
GADD45GIP1	0.57079	0.832097	0.0646835	0.343289
KDELR2	0.570599	8.20512	0.021485	0.22061
RNF168	0.570499	3.52461	0.0757805	0.369894
ZNF106	0.570472	6.90255	0.0364378	0.274966
NOTCH4	0.570358	3.90594	0.0682435	0.352094
CEBPE	0.570328	4.0923	0.0491415	0.309357
WTIP	0.57028	3.66487	0.0696759	0.355102
NDUFAF3	0.570138	6.27033	0.024713	0.233895
TPCN1	0.570115	5.83525	0.0464828	0.303539
UBN2	0.570109	3.96276	0.0676294	0.350408
MLYCD	0.570081	8.19528	0.036	0.273212
SCRIB	0.570021	5.40829	0.0301369	0.2564
STAP2	0.569999	6.70408	0.0216308	0.221475
ICAM2	0.569938	3.07224	0.093377	0.405428
SLC29A2	0.569749	0.787446	0.0667771	0.348879
METTL4	0.569744	1.29114	0.0797043	0.378394
SQSTM1	0.569666	7.53595	0.0498891	0.310673
ATP6V0D2	0.569661	4.05782	0.101529	0.418276
CASTOR2	0.569283	1.52887	0.0619579	0.33659
MRPL49	0.569258	4.72579	0.061505	0.335174
MTMR12	0.569189	2.97298	0.0500038	0.310682
MXD1	0.569033	1.49159	0.0827045	0.38404
VRK2	0.568558	3.74916	0.0628801	0.339506
H2AJ	0.568548	7.68407	0.0424633	0.292516
TNRC6B	0.568326	5.22359	0.0929951	0.405155
SLC38A3	0.568101	9.35827	0.019836	0.213586
ADAM11	0.567876	5.69396	0.0368125	0.276612
FBXL14	0.567799	2.24654	0.0576277	0.32503
RNF126	0.567719	4.15252	0.049787	0.310673
SLC45A4	0.56759	3.68926	0.0492536	0.309437
SECISBP2L	0.567295	6.2859	0.0668431	0.348929
FCRLB	0.567289	2.97012	0.0434419	0.294278
SRA1	0.566878	6.8461	0.0602638	0.332675
SNX21	0.566614	4.26995	0.0332917	0.265809
ZNF622	0.566584	6.36796	0.0235134	0.229461
CELA1	0.566474	5.67496	0.0353887	0.271388
TEAD3	0.566172	3.15616	0.0610299	0.334203
TSTD2	0.566064	1.49617	0.0627652	0.339136
INHBE	0.565363	5.16565	0.0382896	0.281534
MMP15	0.565237	6.37987	0.0824959	0.383809
BOLA1	0.56452	2.09714	0.0839258	0.385437
LRP3	0.564495	3.42535	0.0497183	0.31049
PML	0.564389	3.93105	0.0611085	0.334383
KLC2	0.564351	3.83863	0.354919	0.683132
CTDSP1	0.564169	3.36471	0.0527036	0.314695
TRIM80P	0.564002	2.46465	0.0818316	0.382008
FTCD	0.563776	9.79521	0.0314492	0.260893
P4HB	0.563541	11.0892	0.03595	0.273116
NICN1	0.563452	4.71616	0.0437882	0.295145
SLC41A1	0.56339	2.74698	0.0547768	0.320598
CNTNAP2	0.563013	1.61058	0.233716	0.576587
CLIP1	0.562872	4.7355	0.0608294	0.333839
DDX47	0.5623	7.05864	0.041961	0.291255
ANKRD27	0.562239	5.41196	0.0324576	0.262677
ALG3	0.562227	5.02727	0.046563	0.303539
LDB1	0.56189	6.01713	0.032067	0.261797
G0S2	0.561787	8.31361	0.100042	0.416447
ENHO	0.561675	6.07204	0.0322154	0.262021
MAN2B2	0.561486	5.10245	0.0369662	0.276862
STXBP2	0.561433	7.07985	0.0392745	0.284347
FGFR2	0.561187	6.18438	0.0439608	0.295683
TACC1	0.560811	5.58846	0.0391432	0.28407
NUAK1	0.560422	2.00487	0.0455584	0.302089
NUDT3	0.560362	6.04554	0.040845	0.288224
MBTPS1	0.560075	6.75054	0.0246825	0.233895
MAFF	0.560064	2.80756	0.0559861	0.323705
ARPC5	0.559838	7.53068	0.0638253	0.342035
TLE5	0.559672	8.15881	0.0343563	0.267469
CHM	0.559116	5.04381	0.0873364	0.393292
SPARC	0.559093	6.21062	0.0674218	0.350378
RTN4RL2	0.559064	0.844688	0.102365	0.419273
SERGEF	0.558901	3.72093	0.0539302	0.31806
LETMD1	0.558796	5.72469	0.0564678	0.324031
UBTF	0.558729	3.98546	0.0374331	0.277749
SPATA2L	0.55854	6.35471	0.0288286	0.251657
RANBP3	0.558312	4.87148	0.0410972	0.288825
RHOBTB1	0.558296	6.9294	0.0241999	0.23255
HSF1	0.558255	4.74406	0.0470334	0.304683
SIRT7	0.558019	7.56324	0.0378064	0.279237
ANPEP	0.557892	3.27102	0.0417699	0.290484
DAAM1	0.557303	5.30502	0.0764222	0.371375
COX19	0.557263	7.51725	0.0416621	0.290147
TWF1	0.557144	5.87534	0.0740625	0.366301
PCK1	0.557029	11.2074	0.0420231	0.291255
EML2	0.556998	3.57596	0.0594187	0.33062
GALNT1	0.556991	5.89258	0.048556	0.308326
SIDT2	0.556976	7.34063	0.024234	0.232646
SMCO4	0.556923	4.09104	0.0478516	0.306821
PDE4A	0.556905	2.57602	0.120484	0.4433
CNOT3	0.556731	3.49212	0.0430747	0.293801
CA8	0.55649	2.31003	0.106509	0.425876
RHBDD3	0.556112	5.54381	0.0558737	0.323705
RNF215	0.555843	4.76028	0.0473363	0.30539
FKBPL	0.555741	4.2886	0.0544852	0.31953
SHB	0.555511	7.54727	0.0460475	0.302564
TPGS1	0.555463	4.67541	0.0349796	0.26938
CPXM1	0.555414	0.595819	0.0761575	0.370581
SLPI	0.555247	3.35901	0.0551188	0.321699
HARS2	0.554964	3.28135	0.10619	0.425108
CACUL1	0.554183	3.42021	0.0554319	0.322369
ZBTB18	0.55403	4.60114	0.0535648	0.316625
NIP7	0.55366	4.55982	0.0584504	0.327555
CDC27	0.552967	4.53889	0.0489692	0.309044
ZBED4	0.552901	4.46207	0.0947139	0.407724
PATE2	0.55278	0.460094	0.0766741	0.371813
CTSS	0.552778	5.71916	0.0963768	0.410589
LAPTM4B	0.552584	5.11778	0.111126	0.432714
SUDS3	0.552359	6.76275	0.0391329	0.28407
NDUFA3	0.552284	9.11337	0.0250632	0.235312
ZCWPW1	0.552231	3.55821	0.0994489	0.415279
LARP1	0.552134	5.43411	0.0802107	0.379432
SFSWAP	0.551617	5.18942	0.0503428	0.311071
BUB1B	0.551569	0.720542	0.0748207	0.367745
ADPRH	0.550819	5.31062	0.046327	0.303021
MAP3K11	0.550786	4.96188	0.0618994	0.336446
NDUFA1	0.550635	8.6161	0.046315	0.303021
MPP1	0.550254	4.8548	0.311303	0.646098
PROC	0.550197	9.73052	0.0233065	0.228776
GID4	0.55012	5.02636	0.0569223	0.324405
BAZ1B	0.549794	5.05673	0.0359286	0.273095
C11orf86	0.549651	4.18729	0.0433923	0.294079
E4F1	0.549564	3.44022	0.042745	0.293223
HLA-DQA1	0.549427	6.84182	0.0345791	0.268272
CCDC51	0.549334	3.98932	0.047158	0.304944
SNORD8	0.54916	2.86999	0.0467054	0.303731
INPP1	0.549129	4.54662	0.0645711	0.343289
SAFB	0.549016	5.81405	0.0334201	0.266197
MPND	0.548783	7.69243	0.052822	0.314695
MIX23	0.548736	0.93379	0.0575264	0.324865
TIMP1	0.548555	2.06742	0.0518706	0.313418
ATP1B4	0.548506	5.30989	0.0341251	0.267158
RAB2A	0.548357	7.5517	0.037573	0.278247
NTF3	0.548143	0.760421	0.084848	0.387967
TMEM222	0.548112	6.06678	0.0426271	0.292689
PKHD1L1	0.548103	2.26952	0.150709	0.483599
SHMT2	0.547843	7.43614	0.0267069	0.243112
SEC14L2	0.547609	10.2231	0.0261056	0.24083
PCSK6	0.547434	7.93695	0.0555243	0.322649
PUS7L	0.546927	2.41829	0.0928609	0.405086
GALNT2	0.54617	5.96028	0.0589931	0.329186
DEFB116	0.546161	4.11252	0.104847	0.422322
ODR4	0.546132	5.67471	0.118947	0.442003
POC5	0.546085	1.90531	0.102265	0.419273
EFCAB2	0.545929	2.26552	0.0756174	0.369779
ZNF7	0.545763	1.18822	0.100367	0.416996
CHD7	0.545443	5.15151	0.036716	0.27621
C5orf22	0.545423	3.75729	0.0854172	0.389043
SART3	0.545078	5.06956	0.036195	0.273981
COQ4	0.544976	0.323855	0.0803486	0.379432
METAP2	0.544889	3.89173	0.100919	0.417685
AQP12A	0.544522	1.92165	0.137381	0.466718
EBI3	0.54451	2.20756	0.0733876	0.364449
NDUFA6	0.544479	10.0763	0.0471306	0.304944
NSD1	0.544415	3.63937	0.0900753	0.399389
LMNB2	0.544393	3.55036	0.0458029	0.302431
IRF2BP2	0.544247	6.34778	0.0357856	0.272716
THAP1	0.54422	2.90778	0.09757	0.412376
PARP16	0.543257	5.91871	0.0491038	0.309357
HDAC6	0.543178	5.83875	0.0827292	0.38404
CLEC4F	0.543172	7.13976	0.0605098	0.333057
TRAF3	0.543162	4.99988	0.0399343	0.286126
SMG9	0.543085	3.97056	0.0535046	0.31657
CENATAC	0.542816	4.83431	0.0966464	0.410938
MIRLET7E	0.542493	2.10831	0.114268	0.436644
UBE2W	0.542373	5.74508	0.112662	0.433954
RNF10	0.54226	7.79216	0.0475005	0.305641
SS18	0.542156	5.93143	0.056598	0.324123
SPON2	0.541989	5.55845	0.066328	0.347859
TENT4A	0.541909	5.23764	0.0689885	0.353817
KAT2B	0.541881	4.57963	0.0667205	0.348879
TMEM250	0.54179	7.27374	0.0300795	0.2564
SFRP5	0.541372	1.466	0.0741018	0.366301
POLR2J	0.541261	6.90901	0.0409859	0.288459
LMF1	0.541238	6.92197	0.0326773	0.26358
PLA2G6	0.540891	5.01429	0.0609321	0.333917
IRS2	0.540779	5.09841	0.0417441	0.290442
AKAP17A	0.540647	4.30161	0.0887209	0.396323
FGL1	0.540372	10.905	0.0459315	0.302564
CCDC9B	0.540116	0.815854	0.101928	0.419273
MMP14	0.539924	5.90366	0.097039	0.41138
ARRDC2	0.539774	4.13962	0.0569774	0.324405
VPS35L	0.539596	4.0231	0.106364	0.42569
TBCC	0.539406	5.98007	0.0669468	0.349346
PVR	0.539359	5.20949	0.17637	0.516956
FNTA	0.539271	6.56276	0.114782	0.437138
FOXN3	0.539269	5.51183	0.0500781	0.310879
ZNF24	0.539262	5.13522	0.071373	0.359375
THADA	0.539193	0.700868	0.0633772	0.341183
SFN	0.539099	1.6762	0.135863	0.464256
WDR82	0.539068	6.46292	0.0625893	0.338561
AKT1	0.538988	5.90827	0.0370166	0.276862
CCDC107	0.538948	7.65166	0.0333163	0.265809
AFMID	0.538473	7.41672	0.0534724	0.316508
MED15	0.538376	4.66945	0.0470242	0.304683
ARMCX5	0.538235	1.93628	0.127368	0.452011
CDK16	0.538064	3.62636	0.0465867	0.303539
CNTRL	0.537472	4.63503	0.0461053	0.302564
PLXNC1	0.53745	0.592555	0.0899383	0.398979
CARS2	0.537206	5.05019	0.0399628	0.286126
FNIP2	0.536549	2.96639	0.115734	0.43826
PCYT1B	0.536291	0.839224	0.0971257	0.411448
TMEM167B	0.536167	5.65922	0.0472103	0.304944
SLC35B4	0.536096	5.13511	0.0424233	0.292516
CPOX	0.536042	6.27798	0.0377894	0.279237
ZNF362	0.535901	2.39014	0.0686221	0.3533
TMPRSS7	0.535473	1.91058	0.130675	0.457853
YJU2	0.535357	4.26313	0.102495	0.419493
METTL18	0.535134	3.89943	0.0728073	0.36278
RBCK1	0.535112	4.25238	0.111161	0.432714
ABCF1	0.53486	6.52187	0.0321162	0.261797
PRORP	0.534857	5.27247	0.0716777	0.360037
PLG	0.534687	11.1818	0.0319862	0.261797
PPIG	0.53466	2.4503	0.0720998	0.361042
PLEKHO1	0.534557	2.07801	0.0803882	0.379432
FNDC4	0.534529	5.54088	0.0557919	0.323657
ZBTB5	0.534509	3.98649	0.0460393	0.302564
SLC35E3	0.534436	6.18154	0.0407052	0.288146
GGT6	0.534275	5.69202	0.0804451	0.379578
CHERP	0.534061	4.66441	0.0459652	0.302564
ANP32B	0.5338	5.95983	0.0799896	0.379141
AK3	0.533721	9.79479	0.0288639	0.251657
LEMD2	0.533626	6.31984	0.0360801	0.273596
SNORD104	0.533452	5.40601	0.0458807	0.302564
PHLDA1	0.532837	7.24807	0.0461745	0.302564
LRFN3	0.532833	3.64573	0.0485496	0.308326
FRA10AC1	0.532522	5.63508	0.0394498	0.285051
STK16	0.532424	3.98005	0.0884091	0.395839
CSNK2B	0.532368	6.87472	0.0326087	0.263172
GPR88	0.53223	0.596491	0.172498	0.513319
TMEM106C	0.532189	4.03932	0.067776	0.350796
POU5F2	0.53202	2.26132	0.070683	0.358164
RBM6	0.531957	4.90205	0.0441562	0.296373
CD72	0.53195	3.61146	0.0549045	0.321217
MED21	0.531666	5.92322	0.0544245	0.319504
PITPNM2	0.531557	4.78104	0.0441504	0.296373
RN7SK	0.531469	3.15698	0.0543369	0.319172
ERRFI1	0.531361	9.09891	0.0559482	0.323705
HAGHL	0.531204	4.8929	0.0498821	0.310673
NAGA	0.531079	3.56813	0.0614285	0.335131
ALDH4A1	0.531032	7.32143	0.030711	0.258741
SDCBP	0.530986	2.87182	0.123917	0.44687
MTUS1	0.530968	6.13307	0.0489764	0.309044
TJP2	0.530873	5.85395	0.0405976	0.287799
C2orf72	0.530813	7.04237	0.0369734	0.276862
TM9SF4	0.530734	5.86339	0.042385	0.292516
CANT1	0.530047	5.80221	0.0420068	0.291255
WARS1	0.529946	4.555	0.0437249	0.295103
KDF1	0.529803	3.9706	0.0505756	0.311457
PLVAP	0.529747	9.34165	0.0403957	0.287495
TXN2	0.529717	8.30666	0.0597779	0.33144
PLEKHG2	0.529665	5.36888	0.048372	0.308326
CDKN2D	0.52954	2.15572	0.0852131	0.388709
FLII	0.529364	5.89366	0.0576445	0.32503
ARHGAP44	0.529294	2.20648	0.0984513	0.41371
TSSK4	0.52872	0.560383	0.160854	0.496335
PHKG2	0.528456	6.14215	0.0375093	0.278032
PRRG2	0.528445	6.53119	0.0333227	0.265809
IFT22	0.528361	3.16685	0.13475	0.463374
CYGB	0.528343	4.23111	0.0581788	0.32691
GPC6	0.528014	1.98422	0.146398	0.477735
TTPAL	0.527981	4.79209	0.0508303	0.312155
UBXN4	0.527497	6.2214	0.0960802	0.410412
CTU1	0.527409	2.99044	0.0689596	0.353817
ARHGEF3	0.527372	5.88819	0.0391884	0.284145
ANAPC16	0.52731	5.86626	0.11362	0.435802
SEMA4G	0.527147	8.34422	0.0414967	0.289785
SSR1	0.527089	5.97515	0.0643434	0.342955
DBP	0.526839	4.92895	0.0486598	0.308326
LPIN2	0.526689	7.62008	0.0924682	0.404483
SELP	0.526457	1.48712	0.129717	0.455992
ACYP1	0.526124	3.91848	0.0863383	0.391357
PIGT	0.525953	3.77957	0.0745992	0.36715
TEX264	0.525951	6.39552	0.0534702	0.316508
IRF2	0.525914	5.56566	0.0600357	0.331989
CTNS	0.525847	4.44833	0.05621	0.324031
ZBTB40	0.525828	4.04153	0.0551611	0.321719
KIAA0232	0.525776	5.63559	0.0443503	0.297092
UBA5	0.525735	5.90799	0.0656616	0.34672
PGD	0.525634	5.77567	0.110994	0.432694
NPSR1	0.52559	2.04874	0.199735	0.543929
NCOR2	0.525546	4.92843	0.0972206	0.411612
AJUBA	0.525453	4.15426	0.0525045	0.314695
MKS1	0.525401	2.55372	0.0643696	0.342955
TTLL12	0.525393	4.07922	0.0626629	0.338708
ARHGEF26	0.524972	4.38933	0.0802577	0.379432
STK4	0.524725	5.74016	0.0397524	0.286108
SLC25A28	0.524499	6.16427	0.0708153	0.358164
ST3GAL3	0.524485	6.66489	0.0456664	0.302382
MACROH2A1	0.524373	6.32541	0.0614768	0.335174
FNDC5	0.524256	0.463598	0.10134	0.418275
TATDN3	0.52422	4.22202	0.0768112	0.372153
TMEM184A	0.523954	4.56596	0.0696277	0.355102
PRICKLE2	0.523854	2.15786	0.074411	0.366593
TSHZ1	0.523202	3.86082	0.120702	0.4433
MINPP1	0.521576	7.12524	0.0337415	0.266561
CTNNBL1	0.521554	0.189301	0.12159	0.44433
ELP2	0.521448	6.61632	0.0880519	0.395086
STIM1	0.521446	4.5197	0.0527868	0.314695
AGT	0.52128	8.86854	0.0425219	0.292516
COQ2	0.521195	6.21977	0.073649	0.365175
SERPINA6	0.520682	9.44838	0.0614106	0.335131
DCAF12	0.520535	5.52302	0.0459058	0.302564
PIK3C2B	0.520367	3.87198	0.0807326	0.379664
ANXA1	0.520171	3.12659	0.13096	0.458203
S100A1	0.519643	8.54315	0.0336225	0.266524
NUP188	0.519272	2.41775	0.0601151	0.332052
FAM3A	0.518797	5.64074	0.0455766	0.302089
FADS6	0.51864	3.70755	0.0958892	0.40998
ZSWIM1	0.51857	3.34669	0.0831695	0.384498
APBA3	0.518154	6.44798	0.0368805	0.276736
DUS1L	0.518077	8.11901	0.0345457	0.268155
RNASE4	0.517869	10.8924	0.0480719	0.307694
OS9	0.517838	6.75632	0.0538918	0.317962
CREB3L3	0.517644	9.3078	0.0767977	0.372153
FUZ	0.517626	3.7104	0.0573867	0.324574
ZNF410	0.517341	4.43222	0.0507962	0.312155
ELMO2	0.517281	5.02037	0.230857	0.573808
GRIN3B	0.516335	0.318436	0.0956277	0.409467
EDC4	0.516301	4.98492	0.0573255	0.324543
WDR1	0.516216	6.03533	0.0469141	0.304681
PSME3	0.516169	4.32079	0.0551031	0.321699
PCNX3	0.516163	4.73329	0.0513695	0.313418
PHAX	0.516161	6.03884	0.0929173	0.405086
BDH2	0.515406	4.14956	0.127935	0.453145
TTC27	0.51537	4.63094	0.0776054	0.373896
ZCCHC18	0.515276	3.67442	0.0704401	0.357503
SLC29A1	0.51524	7.96075	0.0594863	0.3307
MFSD13A	0.515159	2.88649	0.0606069	0.333057
SMARCD2	0.514691	7.85377	0.0354486	0.271556
HAUS1	0.514396	3.98293	0.0891693	0.397248
CMIP	0.514294	5.65236	0.0506313	0.311669
WFDC21P	0.514238	10.5201	0.0573584	0.324543
MGST1	0.514167	10.6637	0.0671336	0.350071
SDC4	0.513401	9.2211	0.037297	0.277584
ELOVL3	0.513139	5.46417	0.049658	0.31049
SNX18	0.512513	5.45657	0.057596	0.325026
ERGIC1	0.512479	4.97823	0.116081	0.43866
SPG21	0.512442	6.48964	0.0417991	0.290518
UBE2D1	0.51216	3.44614	0.059631	0.331109
HSBP1	0.511702	8.44641	0.0569256	0.324405
ATP8A1	0.511381	1.87882	0.0862669	0.391276
PSMC4	0.511037	8.20267	0.0445106	0.297659
RAD23A	0.510716	5.75365	0.0472254	0.304944
GNS	0.510668	9.24471	0.0403248	0.287407
ESR2	0.510373	3.73373	0.0690007	0.353817
SNHG8	0.51022	2.28483	0.0765684	0.371779
SLC25A21	0.510115	3.87328	0.116573	0.438951
RCC1L	0.509694	4.20055	0.0699869	0.355943
NEU1	0.509604	4.00857	0.100076	0.416471
ARL6	0.509554	3.3321	0.110181	0.431405
COL27A1	0.509231	2.36742	0.085429	0.389043
MREG	0.508942	5.54138	0.0639616	0.342035
SPPL2B	0.508616	5.09755	0.0878494	0.394661
ALAD	0.508487	6.18261	0.0439726	0.295683
UBFD1	0.508436	5.10503	0.0911698	0.401039
BOLA3	0.508365	7.73217	0.099904	0.41611
ECHS1	0.50836	8.80051	0.0912838	0.401039
TSC22D4	0.508282	2.57575	0.0678805	0.351088
DDX17	0.507861	8.41335	0.0403974	0.287495
BTBD3	0.50784	3.03057	0.11222	0.433248
SYTL3	0.507648	3.03863	0.0741879	0.366301
HCST	0.507573	2.44229	0.0754982	0.369585
HECTD4	0.507538	4.69556	0.056515	0.324031
TPMT	0.507491	6.21024	0.0629238	0.339617
GFRA2	0.507432	1.56527	0.12861	0.454475
COX17	0.507295	6.89643	0.062159	0.337356
PAQR7	0.507199	6.43966	0.0532557	0.315804
BBC3	0.506865	3.89563	0.0719857	0.360826
IGFLR1	0.506829	2.32253	0.067432	0.350378
DYNLL1	0.506821	1.19079	0.126649	0.45077
GCHFR	0.50661	9.29947	0.039641	0.285446
ZCCHC14	0.506482	4.75262	0.0617439	0.335917
C17orf80	0.506263	4.15823	0.0946909	0.407724
NTPCR	0.505961	5.24013	0.0819144	0.382197
DSG2	0.505587	7.25373	0.0658211	0.346993
TSFM	0.505096	6.27681	0.0513825	0.313418
ZHX3	0.505048	3.71242	0.076674	0.371813
SEPTIN4	0.504646	4.5925	0.0936509	0.406015
PCSK4	0.504601	3.49583	0.0646736	0.343289
UTP4	0.504418	4.79511	0.0806552	0.379664
BRD3	0.504399	4.93155	0.0580043	0.32618
MYO1B	0.504399	7.90419	0.0973471	0.412029
CDC37L1	0.504173	5.72792	0.0851012	0.388518
ADAM9	0.503912	7.81927	0.0784127	0.375513
ATP2B1	0.503896	5.31833	0.0532031	0.315804
RHOBTB2	0.503802	4.04657	0.0980761	0.413539
NARS1	0.503773	7.33007	0.0622437	0.337565
ALDOC	0.503699	6.3363	0.108465	0.428769
PKD1	0.503521	4.36109	0.0572044	0.324543
VPS25	0.503452	7.50051	0.0528693	0.314849
ADH7	0.503392	3.82191	0.104547	0.422058
SLC39A11	0.503317	6.10846	0.0492198	0.309357
FAF2	0.503	6.62175	0.0437679	0.295145
RAB3D	0.502945	4.25916	0.111956	0.433068
HSPA14	0.502333	5.69851	0.11564	0.438238
IFT172	0.502255	5.02611	0.0838139	0.385437
FBXW5	0.50203	2.07194	0.0868817	0.392483
COPS4	0.501963	6.14745	0.099042	0.415044
UAP1	0.501843	5.18754	0.0953407	0.409408
KAT5	0.501683	3.83404	0.0677521	0.350796
ARHGAP45	0.501661	3.9649	0.107429	0.426751
PSMF1	0.501493	0.480645	0.104908	0.422405
LRIG1	0.501492	5.42779	0.101567	0.418276
WDTC1	0.501265	5.92237	0.0551882	0.321719
CTNNA1	0.500956	7.7904	0.0769859	0.372465
NIBAN2	0.500251	5.03598	0.0940999	0.406516
TOLLIP	0.500166	6.79209	0.0475607	0.305759
TMEM115	0.500006	4.92416	0.0606576	0.333162
GRIFIN	0.499987	6.66082	0.0518192	0.313418
NSMCE3	0.499907	7.28111	0.0501963	0.310954
NDST2	0.499683	6.03689	0.0566363	0.324123
VPS51	0.499574	6.24335	0.0657627	0.346993
DGCR2	0.499574	7.06094	0.049997	0.310682
SLC25A44	0.499253	6.03443	0.0913808	0.401229
SLC4A2	0.499142	6.5849	0.0461582	0.302564
GTF2H4	0.498843	5.88484	0.0491374	0.309357
PGM1	0.498255	2.5313	0.151047	0.483599
TAPT1	0.498115	7.92226	0.0516968	0.313418
PSMD2	0.498044	7.77203	0.048314	0.308165
THPO	0.49802	3.81652	0.089697	0.398564
CCDC28B	0.498011	4.66463	0.0740972	0.366301
CHAC1	0.497631	4.87332	0.0667933	0.348879
TMEM63A	0.497044	4.91176	0.0604031	0.333057
MUSTN1	0.497033	3.94223	0.142705	0.472731
WWP1	0.496663	4.62384	0.064505	0.343213
NR2F1	0.496405	1.31519	0.0984107	0.413659
ANO6	0.496218	2.55852	0.101275	0.418275
PPCDC	0.496193	3.31217	0.0855455	0.389211
WDR70	0.495901	2.57038	0.121135	0.443714
TDH	0.495844	0.11519	0.172431	0.513225
DHX32	0.49575	6.001	0.122195	0.44556
CMAS	0.495617	7.20911	0.114933	0.437381
PCMT1	0.495552	4.105	0.124159	0.447241
SRFBP1	0.495476	1.5537	0.0910267	0.401039
GPD1	0.495469	9.33368	0.0590113	0.329186
TSNAX	0.495252	5.75363	0.115612	0.438238
PM20D1	0.495248	7.0762	0.118823	0.44189
DEAF1	0.495177	3.73629	0.0670855	0.349945
DDX58	0.495112	3.36022	0.120954	0.443447
ACVR1	0.494752	5.23814	0.10906	0.429527
AKAP1	0.494515	6.12269	0.055327	0.322015
KLHDC8A	0.494048	-0.0709942	0.169136	0.508672
PLIN2	0.493856	8.89179	0.0863184	0.391357
GPS2	0.493811	5.64911	0.0596668	0.331109
SEC16B	0.493637	6.09899	0.0782704	0.375124
UFD1	0.493569	4.5032	0.0962377	0.410589
EFNA1	0.49349	7.91133	0.0755779	0.369762
TUBGCP2	0.493425	5.07669	0.0572295	0.324543
HABP2	0.493418	8.66602	0.0451722	0.30066
TEDC2	0.493208	7.84766	0.0572287	0.324543
C11orf58	0.493145	5.41121	0.124496	0.448005
ATG16L2	0.492664	4.52924	0.104246	0.421789
SOD2	0.492626	9.68784	0.0782295	0.375124
RNF25	0.492433	5.33166	0.0598119	0.331503
MAU2	0.491863	2.23615	0.104859	0.422322
FRYL	0.491744	5.21149	0.111283	0.432714
DECR2	0.491457	7.93487	0.0482198	0.307967
DMAP1	0.491405	4.97817	0.0601017	0.332052
CDYL2	0.491386	3.81864	0.220696	0.564155
MBLAC2	0.490663	3.05501	0.138314	0.46742
PIP5K1C	0.490598	3.43441	0.0786831	0.376116
MCEE	0.490404	8.85943	0.0885802	0.396044
CCDC157	0.490369	4.36883	0.10861	0.429044
RBM22	0.490326	3.2534	0.0807487	0.379664
AKT1S1	0.490078	6.15784	0.101539	0.418276
NDRG3	0.489905	5.20613	0.0828607	0.384163
TRMT10A	0.489851	0.470233	0.120148	0.4433
RFXANK	0.489567	4.201	0.0951539	0.409081
FAM107B	0.489502	6.46347	0.065574	0.34642
ABCC6	0.489172	4.2338	0.0681877	0.35193
MTHFSD	0.4891	4.49926	0.0870462	0.392731
KLC1	0.489004	4.85509	0.0865035	0.391864
MROH2B	0.488954	1.83848	0.0828498	0.384163
C9orf40	0.488671	5.85301	0.12636	0.45062
PELO	0.488623	7.00242	0.0517422	0.313418
FAT3	0.488585	2.17408	0.101424	0.418275
CEP57	0.488535	3.48823	0.127736	0.452878
MAPK8	0.488474	3.73105	0.145576	0.476739
IPO8	0.48842	6.32668	0.16714	0.505497
PPP1R12C	0.48837	4.10672	0.092616	0.404821
RAB13	0.48819	5.0544	0.0632124	0.340797
DNAAF8	0.487945	1.06746	0.248337	0.589882
PEX3	0.487272	4.54136	0.110282	0.43157
IL7R	0.487118	0.425007	0.167647	0.505938
SEC14L3	0.487079	0.20715	0.27593	0.616022
POLR3GL	0.487058	4.17903	0.120314	0.4433
THAP11	0.486974	5.84021	0.0703563	0.357201
LPP	0.486932	5.90011	0.0568293	0.324367
EPRS1	0.486539	6.85857	0.0747631	0.367585
CETN4P	0.486401	1.48524	0.156152	0.489988
BAX	0.486306	2.56181	0.105578	0.423702
TBCB	0.486264	7.38567	0.0525108	0.314695
ZNF697	0.48616	0.507175	0.124271	0.447535
C9orf152	0.48613	4.46427	0.108508	0.428769
SUGCT	0.4861	6.12798	0.160899	0.496355
GRB2	0.485885	7.00398	0.0518182	0.313418
ARID4B	0.485882	2.71434	0.164034	0.500938
HNRNPUL2	0.485785	6.69883	0.0612782	0.335011
ARL4A	0.485745	4.88765	0.102763	0.419892
IRF9	0.485486	4.9293	0.0969171	0.411279
OSER1	0.485184	6.21499	0.0860561	0.390441
CPNE9	0.485091	1.96955	0.171443	0.51131
MFGE8	0.484825	5.71534	0.100996	0.417685
MAPK15	0.484789	4.31071	0.0673109	0.350371
TAF6	0.484648	3.51919	0.0799464	0.379121
CCDC138	0.484423	1.19166	0.120119	0.4433
ENTPD8	0.484172	5.60501	0.06365	0.342005
CP	0.483237	9.56463	0.0666273	0.348549
TMEM63B	0.482867	5.83022	0.0639702	0.342035
BLCAP	0.48265	6.08255	0.085837	0.38981
TMEM87A	0.482565	3.62069	0.104272	0.421789
CYP2D6	0.48256	10.5573	0.0711361	0.358671
POLR1F	0.48238	5.16908	0.0943625	0.40681
ALG2	0.482367	4.39254	0.0668097	0.348879
CYP2G1P	0.482031	2.08999	0.11132	0.432714
IKBKE	0.481913	5.78544	0.0612821	0.335011
GPR83	0.481724	6.71715	0.107832	0.427702
ZFP64	0.481711	3.35371	0.0869134	0.392505
PMPCA	0.481705	6.41812	0.055307	0.322015
LAMA2	0.481615	1.31753	0.139909	0.468884
SKIV2L	0.481181	6.44063	0.0807125	0.379664
GCDH	0.481103	7.85837	0.0492163	0.309357
SERPINH1	0.481059	4.659	0.0850928	0.388518
MED30	0.481045	4.92659	0.189788	0.532907
MAGEL2	0.480742	4.06313	0.0720217	0.360826
KLHL9	0.480663	5.91035	0.0830336	0.384243
RAC1	0.480629	7.69588	0.0558083	0.323657
ABHD18	0.480488	3.69072	0.170936	0.510812
SEC61A1	0.480478	8.80361	0.0477116	0.306191
GPR160	0.480288	1.47948	0.0912851	0.401039
GOT1	0.479689	8.89904	0.120358	0.4433
ACY1	0.479512	7.43791	0.0544589	0.319504
EAF1	0.479504	6.00228	0.0646398	0.343289
CPA4	0.479488	3.89281	0.403991	0.716927
BAK1	0.479462	5.10925	0.0644616	0.343107
CEMIP2	0.479342	5.58684	0.0889046	0.396843
HTRA2	0.478962	3.62439	0.0781238	0.375011
ATXN7	0.478911	2.85771	0.119487	0.44284
CALR	0.47866	8.36171	0.0594815	0.3307
SLX9	0.478563	5.28184	0.0663171	0.347859
ASIC5	0.478392	3.61597	0.0971134	0.411448
DYNLL2	0.478326	9.51868	0.0511206	0.312969
TINF2	0.478241	3.32014	0.124567	0.448029
SLC25A23	0.478235	9.72321	0.0499332	0.310673
ASB1	0.47801	4.10372	0.105708	0.423821
SGTA	0.477952	5.36192	0.093966	0.406516
ELOF1	0.477948	6.25521	0.0578707	0.325553
CCDC57	0.477816	2.73247	0.0911887	0.401039
SAMD4B	0.477501	5.58503	0.0883667	0.39577
SOX3	0.477438	1.88364	0.0882113	0.39568
RANBP2	0.477159	5.3738	0.0979222	0.413288
ETV5	0.477039	3.37172	0.111508	0.432895
MRPL14	0.476934	8.08159	0.079156	0.37739
ZNF358	0.476859	4.21352	0.0832481	0.38474
OSBPL2	0.476668	6.79363	0.0605382	0.333057
CCDC142	0.476666	1.46245	0.106126	0.425086
ZNF136	0.476401	2.45183	0.102309	0.419273
PSMG3	0.476369	6.79321	0.0595453	0.330777
SF3A2	0.476157	4.10234	0.0815502	0.381158
WDR81	0.476048	6.46259	0.0574372	0.324612
SCAMP3	0.475986	5.05617	0.0705321	0.357721
SYMPK	0.475975	6.15448	0.0596729	0.331109
IGFBP2	0.475857	7.59774	0.0731697	0.363675
DAPP1	0.475808	1.00598	0.15764	0.49198
EPB41	0.475589	7.32678	0.0743816	0.366572
CD2BP2	0.475572	3.80443	0.0980738	0.413539
SIGIRR	0.475546	3.8339	0.153923	0.487267
AIP	0.475545	7.04716	0.0621832	0.337362
C5orf15	0.475045	9.12093	0.0853263	0.388939
COG4	0.475041	5.59916	0.0712653	0.359199
RAD9B	0.47489	0.407819	0.111948	0.433068
DYRK3	0.474867	1.77285	0.141138	0.469809
MSLN	0.474853	2.70892	0.0955526	0.409451
MAP3K10	0.4748	1.32233	0.11594	0.438488
ARHGEF19	0.47427	5.46367	0.0803643	0.379432
FAAH	0.474011	7.39575	0.0574681	0.324661
FCGR3A	0.473405	3.94809	0.126731	0.45077
ANKS1A	0.473264	3.64422	0.140553	0.468922
CUL4B	0.473078	4.37919	0.173653	0.514038
GPHN	0.472942	7.73866	0.0563201	0.324031
GAS5	0.472905	8.17807	0.10835	0.428592
PSMD3	0.472854	8.31583	0.0833578	0.384862
ACO2	0.47284	7.6252	0.085378	0.389043
DGKQ	0.472457	5.05589	0.114456	0.43695
IRGM	0.472257	5.7607	0.126603	0.45077
TALDO1	0.471678	9.25821	0.0559067	0.323705
CYP1A1	0.471617	1.43598	0.105252	0.423185
IL1R1	0.471476	6.36724	0.0814961	0.381158
C1orf109	0.471445	3.37404	0.0866866	0.392072
ODF3B	0.471438	5.70718	0.0754212	0.369332
ALAS2	0.471318	8.38643	0.125548	0.449446
MEPE	0.471142	-0.0172299	0.143146	0.473658
FBXL7	0.470994	2.75418	0.11603	0.438581
NOTUM	0.47084	4.61143	0.0793289	0.378084
RBFA	0.470795	6.72831	0.0605744	0.333057
NUBP1	0.470666	7.44984	0.0926632	0.404852
CHRM5	0.470556	4.49065	0.0758264	0.369894
CIAO1	0.470552	3.9385	0.109268	0.429786
SMYD5	0.470465	4.54747	0.101386	0.418275
RDH5	0.470176	6.63712	0.0599442	0.331902
DNAI1	0.470165	5.09682	0.0903485	0.400215
CLP1	0.469542	5.05544	0.124806	0.448029
ARMC5	0.469492	4.86063	0.0749837	0.368299
TRPC4AP	0.469322	6.30612	0.126633	0.45077
HS3ST3B1	0.469217	6.65456	0.122899	0.445653
SF1	0.469121	6.42801	0.0731725	0.363675
MALSU1	0.468986	6.10722	0.11195	0.433068
TRMT1L	0.468883	6.23356	0.0964832	0.410748
RABIF	0.468763	4.91879	0.117022	0.439034
TTC36	0.468497	10.5528	0.0630459	0.340025
RNF31	0.468484	4.41118	0.076503	0.371644
GEMIN5	0.468441	4.20505	0.0825911	0.383886
SRSF1	0.468435	6.77457	0.0634803	0.341584
SRRM1	0.468141	5.75895	0.0673952	0.350378
SNX6	0.468088	5.49376	0.117987	0.440813
UGT2B10	0.468056	8.30589	0.0991767	0.415044
RNF187	0.468045	7.02311	0.0805609	0.379664
COX6B1	0.467861	9.98238	0.0602735	0.332675
POFUT1	0.467675	4.32594	0.0794838	0.378214
SAC3D1	0.46748	4.54451	0.150758	0.483599
USP30	0.467392	3.93129	0.0863874	0.391459
THOC2	0.467299	4.73208	0.0940313	0.406516
MRPL36	0.467218	7.22603	0.103963	0.421484
GJB2	0.466862	9.15588	0.142822	0.473015
SIVA1	0.466647	4.81735	0.101111	0.418044
ZMAT5	0.466138	4.37319	0.0976582	0.412479
BLOC1S5	0.466091	6.40425	0.103392	0.420604
MTMR3	0.466078	5.705	0.0776375	0.373927
PKDCC	0.465907	5.14383	0.102982	0.42054
XAB2	0.465735	6.93505	0.0644095	0.342955
MED14	0.465307	3.12833	0.16574	0.503164
GDI1	0.465214	4.52119	0.0892798	0.397427
MYO7A	0.465057	6.67234	0.0658994	0.347099
KCNK2	0.46496	5.04594	0.0858044	0.38981
TRAPPC9	0.464719	4.37262	0.0795788	0.378306
MTARC1	0.46417	8.60977	0.103008	0.42054
SH3BP5L	0.463544	6.18681	0.0690611	0.353817
ACSL1	0.463523	9.70527	0.181246	0.52318
SLC25A20	0.46329	7.79401	0.110175	0.431405
MPST	0.463025	7.01493	0.066329	0.347859
PSMB7	0.462973	6.57399	0.132406	0.459743
LMAN2	0.46277	7.81591	0.061543	0.335256
TYMP	0.462703	4.47845	0.0837181	0.385437
APOC2	0.462689	9.29811	0.0710672	0.358671
WDR83OS	0.462656	3.89499	0.107036	0.42651
STOM	0.462633	7.21314	0.0638276	0.342035
PFDN5	0.462512	8.86505	0.0801333	0.379432
TRMU	0.462511	4.92592	0.0830355	0.384243
PTCD1	0.462451	4.53136	0.0969453	0.41128
AP1B1	0.462317	5.76066	0.090507	0.400574
OAT	0.46197	10.1106	0.0993893	0.415225
KLF16	0.461883	3.55885	0.0914745	0.401456
NFYC	0.461835	4.74395	0.0845325	0.387251
EFR3A	0.461511	6.51613	0.0819786	0.382354
MOV10	0.46143	3.65064	0.125274	0.448606
SDF2	0.461354	7.32554	0.0968738	0.411216
NLRP6	0.46122	7.2977	0.0604973	0.333057
STX7	0.460838	6.41526	0.161348	0.497124
FNBP1	0.460719	1.0766	0.143696	0.474308
SOWAHC	0.460629	4.23738	0.137005	0.465657
MEP1B	0.460483	4.20599	0.109039	0.429527
MAP2K6	0.460469	3.03628	0.109738	0.430479
CRTAP	0.460443	4.91767	0.132678	0.459927
C19orf33	0.460412	6.74247	0.0689109	0.353817
PLEKHA2	0.4602	1.24101	0.181542	0.52362
MT1F	0.45993	11.2747	0.0770163	0.372465
TMEM175	0.45992	3.53642	0.101502	0.418276
ANKHD1	0.459783	1.79521	0.150777	0.483599
HIC2	0.459737	1.95599	0.173336	0.513738
DAPK3	0.459716	4.04481	0.133787	0.461801
SDSL	0.459656	5.2349	0.0788877	0.376599
TBC1D7	0.45935	4.71404	0.099134	0.415044
TRHR	0.459092	0.0326753	0.169025	0.508464
WT1	0.458935	0.924788	0.155532	0.489142
SAR1B	0.458889	9.31371	0.140333	0.468922
TRIM27	0.45883	6.15831	0.0722827	0.361339
VPS28	0.458807	8.49844	0.0678199	0.350898
CATSPER2	0.458693	2.91302	0.0941851	0.406644
FBXO5	0.458671	0.900577	0.129531	0.455992
GALNT11	0.45864	5.3773	0.0771257	0.372689
OPTN	0.458598	5.94684	0.0734065	0.364449
UGCG	0.458583	5.44175	0.0981255	0.413539
DKKL1	0.458368	4.37072	0.0891633	0.397248
DAGLB	0.458309	5.26439	0.0966682	0.410938
GGA1	0.458167	4.19878	0.100971	0.417685
ANGEL1	0.458001	3.23086	0.0925999	0.404821
WDR13	0.457883	5.31038	0.0908462	0.400742
MRPL35	0.457854	4.53199	0.121551	0.44433
STARD3NL	0.457782	5.17152	0.122298	0.44556
FBF1	0.457121	2.84447	0.108903	0.429508
TIMELESS	0.457113	2.48505	0.101697	0.418578
HDHD5	0.457098	4.21434	0.168113	0.506568
CD151	0.457072	6.28123	0.108804	0.429464
CDKN2AIPNL	0.456975	6.2657	0.0745206	0.366985
SETD1A	0.456771	3.3295	0.115974	0.438488
SYTL1	0.456673	0.764214	0.13201	0.459131
RAB36	0.456643	2.61671	0.150621	0.483599
SHMT1	0.456577	7.98765	0.10203	0.419273
NCSTN	0.456557	3.36463	0.0985254	0.413903
CFAP126	0.456513	3.56248	0.15811	0.492648
RPP25L	0.456508	6.2817	0.0897293	0.398579
TIE1	0.456442	4.73464	0.0913954	0.401229
DHX9	0.456355	5.35521	0.1256	0.449446
CISD1	0.456308	7.40805	0.0679351	0.351122
WDR90	0.456222	2.15491	0.118657	0.441779
HIP1	0.456157	2.58514	0.102242	0.419273
LSM4	0.455851	6.92725	0.116639	0.438951
ZNF76	0.455797	5.11202	0.079422	0.378166
FUS	0.455791	5.70445	0.107205	0.426751
PPME1	0.455677	4.69655	0.127514	0.452259
ATP6V1B2	0.455653	6.06712	0.0727684	0.36278
GNA11	0.455399	6.14999	0.0858363	0.38981
RPL37	0.455345	6.93331	0.0866474	0.392072
CCDC22	0.455251	5.47213	0.0892566	0.397427
MIA3	0.455207	1.07994	0.108132	0.428197
ZNF496	0.455187	4.38569	0.105069	0.42284
APOO	0.454874	4.41911	0.171336	0.51131
INSC	0.454737	5.83129	0.103577	0.420653
GIGYF2	0.454612	5.72133	0.0866674	0.392072
FBXL6	0.454597	4.38503	0.11616	0.438732
DCXR	0.454555	8.56266	0.0638688	0.342035
PCYOX1	0.45438	8.7744	0.0801604	0.379432
HSD17B6	0.454347	8.0403	0.0778491	0.374234
PIGH	0.454106	3.31597	0.111357	0.432714
AFDN	0.453782	8.32754	0.0644031	0.342955
[truncated: 12,633 more rows]

## Sheet: Downregulated genes
RNF224
KLHL38
MIR31
GLIPR1L1
GIMD1
WFDC5
SAMD5
OR10K2
GP9
SPRR2A
CTRB2
WNT2B
RP1L1
THEGL
FUT1
MIR598
IMPG1
ARHGEF33
BARX1
PRRG4
GLB1L2
DGKK
FOXR1
SPRY3
TCAM1P
VSIG10L
TMPRSS11B
LRRN3
FCER2
FLRT3
PEBP4
S100A11
FANCC
MORC4
OR51B2
SLC25A30
PRKCG
FLVCR1
PDCL2
FAM217A
CTDSP2
PRMT8
MIXL1
FASN
PIGZ
DAZL
ATP6AP1L
GRIN2B
SLC17A8
TSPAN8
SEZ6L2
THEMIS3P
WSCD2
PPP1R12A
LGALS2
GPR33
GDF11
KCNJ6
BICD1
CLEC1A
FOXL3
IGFL3
CSTL1
FOXN4
OR2C1
HOXC4
CACNA1S
GASK1B
MIR96
ZBTB42
KRT74
TAS2R16
PRSS21
UST
L3MBTL1
TAS1R1
FABP5
MLANA
R3HDML
MCHR1
AKR1C3
MIR676
CD40LG
ASZ1
MIR330
OLIG2
STMP1
SNTB1
PRELID3A
CLEC4A
SYTL2
PNMA8A
FBN2
SLC35C2
KRTAP4-4
MED31
MIR449C
EN2
KLK6
HHAT
MAGEE2
SHROOM4
MAP3K9
SEMA3F
CENPE
PRSS52P
MKLN1
GPRASP2
KRTAP15-1
EGR1
TEPP
FDPS
OTOA
GNG8
HSD17B3
ARG2
OR10G2
STON1
KRTAP6-3
POU2AF1
AGBL4
MYOM3
HYAL4
ALOX12
OR14A2
SNCG
TNR
TXNDC8
MIR665
CCDC69
CDH26
HTR3A
OR2Y1
REG1A
ZNF541
ANAPC1
ZNF804B
KDM5C
BHLHA9
ODF3L1
KCNC4
RNASE12
TMEM150C
APC2
GABRP
MEGF10
IRS4
SCNN1B
TPH1
CNKSR1
TNNI3K
PARVG
CNIH2
CNTNAP3
ANKFN1
RASSF10
XRRA1
KIF2B
GPRC5A
LY6G6F
C22orf15
BMP10
GALNTL6
CXCL17
SYN3
SKOR2
KLHL14
OPRD1
CCL1
CBLN4
GABBR1
RBFOX1
NRIP3
RPH3AL
DPEP3
ZNF483
MAGEA13P
APOD
LINGO3
NOCT
LCE1A
UTS2R
MDH1B
CHRNA4
MGME1
STK33
KCTD19
CTXN3
EREG
IQCH
MPPED2
NLRP1
PNPLA5
WDR64
ACTRT2
KRT81
WNT7B
PARD3B
DEFB126
PARAL1
TMEM167A
OR2AG2
TRH
POTEA
SOCS2
TMEM52B
EVI2B
DMBT1

## Sheet: Upregulated genes
R3HDM2
NXPH4
FOSL2
C20orf96
LAMC2
SYT6
REC114
CSN2
CXCL14
MUTYH
NFYA
PDZK1IP1
EPX
SORCS2
CCL11
MOB1A
FSHB
DAO
AGTR2
KIAA2013
SLFN12L
TNFRSF9
ABCA2
NKX2-5
IDNK
RAMP3
RNU11
KLRG2
LYPD8
RAB2B
NECTIN1
SLC35B2
COP1
TMEM138
STS
LRRC47
PIM3
DERL3
FLOT2
CMTM6
ATXN7L3B
PRRC2A
HYPK
BCL7A
GPT
TNS2
PLA2G15
CA14
SERPINA11
MED24
PRR14
GOSR1
MYCN
RAB5C
PTOV1
CACTIN
FBXO31
WIZ
VARS1
PYGO2
BORCS6
ICAM1
NCOA1
TXNDC11
TMEM100
PLEKHG5
TP53INP2
PCDH1
BNIP1
DNAL4
THRAP3
FKBP8
SAMD3
UPF1
CEBPB
BDH1
ATOH8
MAP1LC3A
RARA
DLGAP4
STARD13
EIF4EBP2
OR1R1P
ERLIN2
ADORA1
KAT7
WBP2
DEPDC1B
DHX38
SLC35A2
C11orf87
AP5Z1
DEPP1
TRAF1
SLC19A1
ZFHX2
BCL6
CCDC65
ELMOD2
ZBTB7A
BCL3
TFPT
TSPAN18
TERF2IP
SAT2
BCL2L12
ABHD4
C11orf96
RGS9
SOCS4
TYSND1
SLC9A8
MGRN1
FBXO21
PPIL2
HDGFL1
MTSS2
ANKZF1
IVD
USP36
ZBTB16
ADAMTS6
RASSF3
MKI67
SRR
CDC14B
MSRB1
TMEM203
ANGPTL6
TCF3
WDR83
MAGOH
TLE1
RAB1B
MLEC
AGFG2
ABCG8
IDH3G
SLC46A1
AKAP8L
FAM53A
KLF3
DSPP
SNAP47
FKBP2
NUP85
TAF4
RPS27
GAS7
